# Supplementary material for: Mapping the distribution of double bond location isomers in lipids across mouse tissues
Source: Royal Society of Chemistry journal article supplement (doi:10.1039/d1an00449b), 2021-01-01
Supplement: d1an00449b2.xlsx [file d1an00449b2.xlsx]

## Sheet: Liver
Subclass	Mass	Intensity	Relative intensity	[M-H]-/[M+OAc]-	FFA Peak	Fatty Acid 1	Fatty Acid 2	[MH+PB]+	Diagnostic Ion 1	Diagnostic Ion 2	Double Bond 1	Double Bond 2		Sample 1	Sample 2	Sample 3	Sample 4	Sample 5		Average	Variation	Coefficient of Variation	Highlight if CV > 20%
PE 32:1	690.507	155000	0.0120177	688.492	253/255	16:1	16:0	748.549	467/493		9			0.85837	0.866532	0.867374	0.857462	0.852016		0.860351	0.00581818	0.00676256	Highlight if CV of technical repeats within 15%~25%
PE 32:1	690.507	155000	0.0120177	688.492	253/255	16:1	16:0	748.549	439/465		7			0.14163	0.133468	0.132626	0.142538	0.147984		0.139649	0.00581818	0.0416628	Highlight if the data is discarded due to 1) CV of technical repeats > 25%; or 2) high deviation compared with other samples
PE O-34:3	700.528	27900	0.00216318	698.513				758.569
PE 34:3	714.507	433000	0.033572	712.492	253/279	16:1	18:2	772.549	491/517	465/491,505/531	9	9,12
PE 34:3	714.507	433000	0.033572	712.492	253/279	16:1	18:2	772.549	463/489	465/491,505/531	7	9,12
PE 34:3	714.507	433000	0.033572	712.492	255/277	16:0	18:3	772.549		467/493,507/533,547/573		9,12,15
PE 34:3	714.507	433000	0.033572	712.492	255/277	16:0	18:3	772.549		425/451,465/491,505/531		6,9,12
PE 34:2	716.522	4670000	0.362081	714.508	255/279	16:0	18:2	774.564		467/493,507/533		9,12
PE 34:2	716.522	4670000	0.362081	714.508	253/281	16:1	18:1	774.564	465/491		7	9
PE 34:2	716.522	4670000	0.362081	714.508	253/281	16:1	18:1	774.564	493/519		9	11
PE 34:1	718.538	572290	0.0443716	716.524	255/281	16:0	18:1	776.58	467/493			9		0.637118	0.609728	0.643366	0.631623	0.64328		0.633023	0.0124383	0.019649
PE 34:1	718.538	572290	0.0443716	716.524	255/281	16:0	18:1	776.58	495/521			11		0.362882	0.390272	0.356634	0.368377	0.35672		0.366977	0.0124383	0.0338939
PE P-36:4	724.528	366000	0.0283772	722.513	364/361	16:0p	20:4	782.569
PE 35:3	728.522	39400	0.00305482	726.508	279/267	17:1	18:2	786.564
PE 35:2	730.538	190000	0.0147313	728.524	269/279	17:0	18:2	788.58	481/507,521/547		9,12
PE 35:2	730.538	190000	0.0147313	728.524	269/279	17:0	18:2	788.58	467/493,507/533		8,11
PE 35:2	730.538	190000	0.0147313	728.524	269/279	17:1	18:1	788.58	479/505		8	9
PE 35:2	730.538	190000	0.0147313	728.524	269/279	17:1	18:1	788.58	507/533		10	11
PE 35:2	730.538	190000	0.0147313	728.524	269/279	17:1	18:1	788.58	493/519		9	10
PE P-36:1	730.575	28200	0.00218644	728.56	339	16:0p	18:1	788.616
PE 36:5	738.507	895000	0.0693924	736.492	253/303	16:1	20:4	796.549	515/541	409/435,449/475,489/515,529/555	9	5,8,11,14
PE 36:5	738.507	895000	0.0693924	736.492	255/301	16:0	20:5	796.549	411/437,451/477,491/517,531/557,571/597			5,8,11,14,17
PE 36:5	738.507	895000	0.0693924	736.492	277/279	18:3	18:2	796.549	449/475,489/515,529/555	489/515,529/555	6,9,12	9,12
PE 36:4	740.522	6480000	0.502416	738.508	255/303	16:0	20:4	798.564	411/437,451/477,491/517,531/557			5,8,11,14
PE 36:4	740.522	6480000	0.502416	738.508	279/279	18:2	18:2	798.564	491/517,531/557		9,12	9,12
PE 36:3	742.538	1902960	0.147543	740.524	279/281	18:2	18:1	800.58	493/519,533/559	491/517	9,12	9		0.788541	0.774574	0.823438	0.80523	0.804298		0.799216	0.0165521	0.0207104
PE 36:3	742.538	1902960	0.147543	740.524	279/281	18:2	18:1	800.58	493/519,533/559	519/545	9,12	11		0.211459	0.225426	0.176562	0.19477	0.195702		0.200784	0.0165521	0.0824375
PE 36:3	742.538	1902960	0.147543	740.524	255/305	16:0	20:3	800.58	453/479,493/519,533/559			8,11,14		0.852817	0.818825	0.818956	0.846836	0.842581		0.836003	0.0143457	0.0171599
PE 36:3	742.538	1902960	0.147543	740.524	255/305	16:0	20:3	800.58	411/437,451/477,491/517			5,8,11		0.147183	0.160103	0.181044	0.153164	0.157419		0.159783	0.0114915	0.0719196
PE 36:2	744.554	2.54274e+06	0.197147	742.539	279/283	18:2	18:0	802.596	495/521,535/561		9,12
PE 36:2	744.554	2.54274e+06	0.197147	742.539	281/281	18:1	18:1	802.596	493/519		9	9		0.716805	0.695289	0.752227	0.736622	0.711825		0.722554	0.0198492	0.027471
PE 36:2	744.554	2.54274e+06	0.197147	742.539	281/281	18:1	18:1	802.596	521/547		11	11		0.283195	0.304711	0.247773	0.263378	0.288175		0.277446	0.0198492	0.0715426
PE 36:1	746.569	111431	0.0086396	744.555	281/283	18:1	18:0	804.611
PE 36:1	746.569	111431	0.0086396	744.555	255/309	16:0	20:1	804.611
PE P-38:6	748.528	156000	0.0120952	746.513	364/385	16:0p	22:6	806.569
PE P-38:6	748.528	156000	0.0120952	746.513	388/361	18:2p	20:4	806.569
PE P-38:5	750.543	166564	0.0129143	748.529	390/361	18:1p	20:4	808.585
PE P-38:5	750.543	166564	0.0129143	748.529	364/387	16:0p	22:5	808.585
PE 37:6	750.507	39200	0.00303931	748.492	241/329	15:0	22:6	808.549
PE 37:6	750.507	39200	0.00303931	748.492	265/303	17:2	20:4	808.549
PE P-38:4	752.559	292180	0.0226537	750.544	392/361	18:0p	20:4	810.601
PE P-38:4	752.559	292180	0.0226537	750.544	364/389	16:0p	22:4	810.601
PE 37:5	752.522	43725	0.00339015	750.508	267/303	17:1	20:4	810.564
PE 37:4	754.538	211584	0.0164048	752.524	269/303	17:0	20:4	812.58		425/451,465/491,505/531,545/571		5,8,11,14
PE 38:7	762.507	693000	0.0537306	760.492	253/327	16:1	22:6	820.549	539/565	421,435/461,475/501,515/541,555/581,595/621	9	4,7,10,13,16,19
PE 38:7	762.507	693000	0.0537306	760.492	277/303	18:3	20:4	820.549
PE 38:6	764.522	10100000	0.783087	762.508	255/327	16:0	22:6	822.564	/423,437/463,477/503,517/533,557/583,597/623			4,7,10,13,16,19
PE 38:6	764.522	10100000	0.783087	762.508	279/303	18:2	20:4	822.564	515/541,555/571	435/461,475/501,515/541,555/581	9,12	5,8,11,14
PE 38:5	766.538	4216700	0.326935	764.524	281/303	18:1	20:4	824.58	437/463,477/503,517/543,557/583	515/541	9	5,8,11,14		0.788462	0.77833	0.822165	0.78355	0.782566		0.791014	0.0159051	0.0201072
PE 38:5	766.538	4216700	0.326935	764.524	281/303	18:1	20:4	824.58	437/463,477/503,517/543,557/583	543/569	11	5,8,11,14		0.211538	0.22167	0.177835	0.21645	0.217434		0.208986	0.0159051	0.0761063
PE 38:5	766.538	4216700	0.326935	764.524	255/329	16:0	22:5	824.58	439/465,479/505,519/545,559/585,599/625			7,10,13,16,19
PE 38:5	766.538	4216700	0.326935	764.524	255/329	16:0	22:5	824.58	397/423,437/463,477/503,517/543,557/583			4,7,10,13,16
PE 38:4	768.554	1.28977e+07	1	766.539	283/303	18:0	20:4	826.596	439/465,479/505,519/545,559/585			5,8,11,14
PE P-40:7	774.543	55600	0.00431086	772.529	390/385	18:1p	22:6	832.585
PE P-40:6	776.559	102105	0.00791653	774.544	392/385	18:0p	22:6	834.601
PE P-40:6	776.559	102105	0.00791653	774.544	390/387	18:1p	22:5	834.601
PE 39:7	776.522	104000	0.00806347	774.508	267/327	17:1	22:6	834.564
PE 39:7	776.522	104000	0.00806347	774.508	265/329	17:2	22:5	834.564
PE 39:6	778.538	177000	0.0137234	776.524	269/327	17:0	22:6	836.58
PE 39:4	782.569	44766.4	0.00347089	780.555	297/303	19:0	20:4	840.611	453/479,493/519,533/559,573/599			5,8,11,14
PE 40:9	786.507	126755	0.00982775	784.492				844.549
PE 40:8	788.522	386577	0.0299726	786.508	279/327	18:2	22:6	846.564	539/565,579/605	421/447,461/487,501/527,541/567,581/607,621/647	9,12	4,7,10,13,16,19
PE 40:8	788.522	386577	0.0299726	786.508	303	20:4	20:4	846.564
PE 40:7	790.538	2660000	0.206239	788.524	281/327	18:1	22:6	848.58	539/565	423/449,463/489,503/529,543/569,583/609,623/649	9	4,7,10,13,16,19		0.859335	0.847234	0.888863	0.862537	0.869221		0.865438	0.013712	0.015844
PE 40:7	790.538	2660000	0.206239	788.524	281/327	18:1	22:6	848.58	567/593	423/449,463/489,503/529,543/569,583/609,623/649	11	4,7,10,13,16,19		0.140665	0.152766	0.111137	0.137463	0.130779		0.134562	0.013712	0.101901
PE 40:6	792.554	2886960	0.223836	790.539	283/327	18:0	22:6	850.596	425/451,465/491,505/531,545/571,585/611,625/651			4,7,10,13,16,19
PE 40:5	794.569	509278	0.039486	792.555	283/329	18:0	22:5	852.611	467/493,507/533,547/573,587/613,627/653			7,10,13,16,19		0.792451	0.795865	0.807534	0.802636	0.752159		0.790129	0.0196945	0.0249256
PE 40:5	794.569	509278	0.039486	792.555	283/329	18:0	22:5	852.611	425/451,465/491,505/531,545/571,585/611			4,7,10,13,16		0.207549	0.204135	0.215684	0.16702	0.247841		0.208446	0.0258451	0.12399
PE 40:5	794.569	509278	0.039486	792.555	303/329	20:4	20:1	852.611	465/491,505/531,545/571,585/611	543/569	5,8,11,14	11		0.66671	0.706747	0.629949	0.681684	0.644622		0.665943	0.0270684	0.0406468
PE 40:5	794.569	509278	0.039486	792.555	303/329	20:4	20:1	852.611	465/491,505/531,545/571,585/611	571/597	5,8,11,14	13		0.33329	0.293253	0.370051	0.314914	0.355378		0.333377	0.027495	0.0824742
PE 40:4	796.585	265066	0.0205515	794.571	283/331	18:0	22:4	854.627	467/493,507/533,547/573,587/613			7,10,13,16
PE 40:4	796.585	265066	0.0205515	794.571	303/311	20:4	20:0	854.627	467/493,507/533,547/573,587/613			5,8,11,14
PC 30:1	704.522	24600	0.000673973	762.529				762.564	594/620
PC 30:1	704.522	24600	0.000673973	762.529				762.564	622/648
PC 31:1	718.538	18938.7	0.000518868	776.545	241/253	16:1	15:0	776.58
PC O-32:1	718.575	24600	0.000673973	776.581	253/255	16:0	16:1	776.616	636/662		9			0.878926	0.869339	0.891025	0.883527	0.853368		0.875237	0.0129972	0.0148499
PC O-32:1	718.575	24600	0.000673973	776.581	253/255	16:0	16:1	776.616	608/634		7			0.121074	0.130661	0.108975	0.116473	0.146632		0.124763	0.0129972	0.104175
PC 32:2	730.538	372000	0.0101918	788.545	227/279	14:0	18:2	788.58	622/648,62/688		9,12
PC 32:2	730.538	372000	0.0101918	788.545	253	16:1	16:1	788.58	620/646		7			0.0984501	0.107009	0.087748	0.081656	0.0802011		0.0918291	0.0113244	0.12332
PC 32:2	730.538	372000	0.0101918	788.545	253	16:1	16:1	788.58	648/674		9			0.90155	0.892991	0.912252	0.918344	0.919799		0.908171	0.0113244	0.0124694
PC 32:1	732.554	2110000	0.0578082	790.56	253/255	16:0	16:1	790.596	678/704		11			0.00412483	0.00560759	0.0042274	0.00450876	0.00451808		0.00459733	0.000528175	0.114887
PC 32:1	732.554	2110000	0.0578082	790.56	253/255	16:0	16:1	790.596	650/676		9			0.879652	0.869793	0.883735	0.880359	0.876638		0.878035	0.00469874	0.00535142
PC 32:1	732.554	2110000	0.0578082	790.56	253/255	16:0	16:1	790.596	622/648		7			0.0945524	0.0978888	0.0861226	0.0935364	0.0957896		0.093578	0.00400022	0.0427474
PC 32:1	732.554	2110000	0.0578082	790.56	253/255	16:0	16:1	790.596	608/634		6			0.0216703	0.026711	0.0259155	0.021596	0.0230544		0.0237894	0.00213999	0.0899556
PC O-34:2	744.59	32800	0.00089863	802.597	279	16:0e	18:2	802.632	636/662,676/702			9,12
PC 33:2	744.554	265000	0.00726027	802.56	255/265	16:0	17:2	802.596	636/662,676/702			8,11
PC 33:2	744.554	265000	0.00726027	802.56	253/267	16:1	17:1	802.596	662/688	662/688	9	10
PC 33:2	744.554	265000	0.00726027	802.56	253/267	16:1	17:1	802.596	634/660	634/660	7	8
PC 33:1	746.569	221405	0.00606589	804.576	255/267	16:0	17:1	804.611		650/676		9		0.806639	0.832105	0.824749	0.814075	0.827196		0.820953	0.00927315	0.0112956
PC 33:1	746.569	221405	0.00606589	804.576	255/267	16:0	17:1	804.611		678/704		11		0.193361	0.167895	0.175251	0.185925	0.172804		0.179047	0.00927315	0.0517917
PC 33:1	746.569	221405	0.00606589	804.576	241/281	15:0	18:1	804.611		636/662		9		0.713457	0.714008	0.707489	0.724719	0.711985		0.714332	0.00567607	0.00794598
PC 33:1	746.569	221405	0.00606589	804.576	241/281	15:0	18:1	804.611		664/690		11		0.286543	0.285992	0.292511	0.275281	0.288015		0.285668	0.00567607	0.0198694
PC O-34:1	746.605	112000	0.00306849	804.611	255/281	16:0e	18:1	804.646		636/662		9
PC O-34:1	746.605	112000	0.00306849	804.611	255/281	16:0e	18:1	804.646		664/690		11
PC 34:4	754.538	347000	0.00950685	812.545	253/277	16:1	18:3	812.58	672/698	606/632,646/672,686/712	9	6,9,12
PC 34:4	754.538	347000	0.00950685	812.545	253/277	16:1	18:3	812.58	644/670	606/632,646/672,686/712	7	6,9,12
PC 34:4	754.538	347000	0.00950685	812.545	253/277	16:1	18:3	812.58	672/698	606/632,646/672,686/712	9	6,9,12		0.391635	0.460297	0.465112	0.37541	0.403215		0.419134	0.0366872	0.087531
PC 34:4	754.538	347000	0.00950685	812.545	253/277	16:1	18:3	812.58	672/698	648/674,688/714,728/754	9	9,12,15		0.608365	0.539703	0.534888	0.62459	0.596785		0.580866	0.0366872	0.0631595
PC 34:4	754.538	347000	0.00950685	812.545	227/303	14:0	20:4	812.58		566/592,606/632,646/672,686/712		5,8,11,14
PC 34:3	756.554	3270000	0.089589	814.56	253/279	16:1	18:2	814.596	702/728	648/674,688/714	11	9,12		0.0544008	0.0373748	0.0431795	0.0390313	0.0360823		0.0420138	0.0066392	0.158024
PC 34:3	756.554	3270000	0.089589	814.56	253/279	16:1	18:2	814.596	674/700	648/674,688/714	9	9,12		0.727282	0.729791	0.744483	0.731614	0.731658		0.732966	0.00597592	0.00815307
PC 34:3	756.554	3270000	0.089589	814.56	253/279	16:1	18:2	814.596	646/672	648/674,688/714	7	9,12		0.214659	0.22207	0.209623	0.222709	0.219878		0.217788	0.00496746	0.0228087
PC 34:3	756.554	3270000	0.089589	814.56	253/279	16:1	18:2	814.596	632/658	648/674,688/714	6	9,12
PC 34:3	756.554	3270000	0.089589	814.56	255/277	16:0	18:3	814.596		608/634,648/674,688/714		6,9,12		0.396856	0.411973	0.437943	0.436565	0.417476		0.420162	0.015509	0.036912
PC 34:3	756.554	3270000	0.089589	814.56	255/277	16:0	18:3	814.596		650/676,690/716,730/756		9,12,15		0.603144	0.588027	0.562057	0.563435	0.582524		0.579838	0.015509	0.0267472
PC 34:2	758.569	36500000	1	816.576	255/279	16:0	18:2	816.611		650/676,690/716		9,12
PC 34:2	758.569	36500000	1	816.576	253/281	16:1	18:1	816.611		648/674	7	9
PC 34:2	758.569	36500000	1	816.576	253/281	16:1	18:1	816.611		676/702	9	11
PC 34:1	760.585	15128000	0.414466	818.592	255/281	16:0	18:1	818.627	650/676			9		0.845063	0.845206	0.85511	0.843403	0.858542		0.849465	0.00614057	0.00722874
PC 34:1	760.585	15128000	0.414466	818.592	255/281	16:0	18:1	818.627	678/704			11		0.154937	0.154794	0.14489	0.156597	0.141458		0.150535	0.00614057	0.0407916
PC O-36:5	766.575	41192.4	0.00112856	824.581				824.616
PC 35:5	766.538	75351	0.00206441	824.545				824.58
PC O-36:4	768.59	104000	0.00284932	826.597	255/303	16:0e	20:4	826.632
PC O-36:4	768.59	104000	0.00284932	826.597	279/279	18:2e	18:2	826.632
PC 35:4	768.554	393000	0.0107671	826.56				826.596
PC 35:3	770.569	154731	0.00423921	828.576	267/279	17:1	18:2	828.611	674/700	662/688,702/728	9	9,12
PC 35:2	772.585	479421	0.0131348	830.592	269/279	17:0	18:2	830.627	664/690,704/730			9,12
PC 35:2	772.585	479421	0.0131348	830.592	255/293	16:0	19:2	830.627	650/676,690/716			9,12
PC 35:2	772.585	479421	0.0131348	830.592	267/281	17:1	18:1	830.627	662/688		8	9
PC 35:2	772.585	479421	0.0131348	830.592	267/281	17:1	18:1	830.627	690/716		10	11
PC 35:2	772.585	479421	0.0131348	830.592	267/281	17:1	18:1	830.627	676/702		9	10
PC 35:1	774.585	150237	0.00411608	832.592	269/281	17:0	18:1	832.627	664/690			9		0.735289	0.7472	0.756721	0.731648	0.756102		0.745392	0.0103664	0.0139073
PC 35:1	774.585	150237	0.00411608	832.592	269/281	17:0	18:1	832.627	692/718			11		0.264711	0.2528	0.243279	0.268352	0.243898		0.254608	0.0103664	0.040715
PC 35:1	774.585	150237	0.00411608	832.592	255/295	16:0	19:1	832.627	650/676			9		0.667987	0.642633	0.681787	0.650004	0.670212		0.662525	0.0142295	0.0214777
PC 35:1	774.585	150237	0.00411608	832.592	255/295	16:0	19:1	832.627	678/704			11		0.332013	0.357367	0.318213	0.349996	0.329788		0.337475	0.0142295	0.0421646
PC 36:5	780.554	4540000	0.124384	838.56	253/303	16:1	20:4	838.596	698/724	592/618,632/658,672/698,712/738	9	5,8,11,14		0.932279	0.951708	0.962968	0.936945	0.928911		0.937461	0.00870631	0.00928712
PC 36:5	780.554	4540000	0.124384	838.56	253/303	16:1	20:4	838.596	670/696	592/618,632/658,672/698,712/738	7	5,8,11,14		0.0573113	0.0432697	0.0259436	0.0582418	0.0562418		0.0537661	0.0061013	0.113478
PC 36:5	780.554	4540000	0.124384	838.56	253/303	16:1	20:4	838.596	656/682	592/618,632/658,672/698,712/738	6	5,8,11,14
PC 36:5	780.554	4540000	0.124384	838.56	255/301	16:0	20:5	838.596	594/620,634/660,674/700,714/740,754/780			5,8,11,14,17
PC 36:5	780.554	4540000	0.124384	838.56	277/279	18:3	18:2	838.596	674/700,714/740,754/780	672/698,712/738	9,12,15	9,12
PC 36:5	780.554	4540000	0.124384	838.56	277/279	18:3	18:2	838.596	632/658,672/698,712/738	672/698,712/738	6,9,12	9,12
PC 36:4	782.569	25068940	0.68682	840.576	255/303	16:0	20:4	840.611	594/620,634/660,674/700,714/740			5,8,11,14
PC 36:4	782.569	25068940	0.68682	840.576	279/279	18:2	18:2	840.611	674/700,714/740			9,12
PC 36:3	784.585	7.41542e+06	0.203162	842.592	279/281	18:2	18:1	842.627	676/702,716/742	674/700	9	9,12		0.663373	0.592152	0.700516	0.665369	0.642374		0.640817	0.0295052	0.0460432
PC 36:3	784.585	7.41542e+06	0.203162	842.592	279/281	18:2	18:1	842.627	676/702,716/742	702/728	11	9,12		0.329943	0.402471	0.295514	0.327833	0.350918		0.352791	0.0300689	0.0852314
PC 36:3	784.585	7.41542e+06	0.203162	842.592	279/281	18:2	18:1	842.627	676/702,716/742	730/756	13	9,12		0.00668419	0.00537667	0.00252121	0.00679826	0.00576848		0.0061569	0.000601872	0.0977557
PC 36:3	784.585	7.41542e+06	0.203162	842.592	255/305	16:0	20:3	842.627	636/662,676/702,716/742			8,11,14		0.955402	0.941121	0.947329	0.949932	0.943687		0.947494	0.0049724	0.00524795
PC 36:3	784.585	7.41542e+06	0.203162	842.592	255/305	16:0	20:3	842.627	594/620,634/660,674/680			5,8,11		0.0445978	0.0588793	0.052671	0.0500678	0.056313		0.0525058	0.0049724	0.094702
PC 36:2	786.601	1.48693e+07	0.407377	844.607	279/283	18:2	18:0	844.643	678/704,718/744			9,12
PC 36:2	786.601	1.48693e+07	0.407377	844.607	281/281	18:1	18:1	844.643	676/702		9	9		0.71242	0.690565	0.756297	0.723302	0.71242		0.719001	0.0214698	0.0298606
PC 36:2	786.601	1.48693e+07	0.407377	844.607	281/281	18:1	18:1	844.643	704/730		11	11		0.28758	0.309435	0.243703	0.276698	0.28758		0.280999	0.0214698	0.0764052
PC 36:1	788.616	1.24317e+06	0.0340595	846.623	281/283	18:0	18:1	846.658	678/704			9		0.79916	0.796601	0.821261	0.798774	0.8138		0.805919	0.0098089	0.0121711
PC 36:1	788.616	1.24317e+06	0.0340595	846.623	281/283	18:0	18:1	846.658	706/732			11		0.20084	0.203399	0.178739	0.201226	0.1862		0.194081	0.0098089	0.0505403
PC 37:7	790.538	44300	0.0012137	848.545				848.58
PC O-38:7	790.575	20300	0.000556164	848.581				848.616
PC 37:6	792.554	141000	0.00386301	850.56				850.596
PC O-38:6	792.59	34395.6	0.000942345	850.597	255/327	16:0	22:6	850.632
PC O-38:6	792.59	34395.6	0.000942345	850.597	279/303	18:2	20:4	850.632
PC O-38:5	794.606	131909	0.00361396	852.612	281/303	18:1	20:4	852.648	684/710	606/632,646/672,686/712,726/752	9	5,8,11,14
PC 37:5	794.569	167696	0.00459441	852.576				852.611
PC 37:4	796.585	401852	0.0110096	854.592	269/303	17:0	20:4	854.627	608/634,648/674,688/704,728/754			5,8,11,14
PC O-38:4	796.621	33677.4	0.000922669	854.628	283/303	18:0	20:4	854.663
PC O-38:3	798.601	119852	0.00328361	856.607	283/305	18:0	20:3	856.643
PC 37:3	798.601	86133.3	0.00235982	856.607				856.643
PC 37:2	800.616	249602	0.0068384	858.623				858.658
PC 38:7	804.551	2620000	0.0717808	862.557	253/327	16:1	22:6	862.592	722/748	578/604,618/644,658/684,698/724,738/764,778/804	9	4,7,10,13,16,19
PC 38:6	806.569	17607000	0.482384	864.576	255/327	16:0	22:6	864.611	580/606,620/646,660/686,700/726,740/766,780/806			4,7,10,13,16,19
PC 38:6	806.569	17607000	0.482384	864.576	279/303	18:2	20:4	864.611	698/724,738/764	618/644,658/684,698/724,738/764	9,12	5,8,11,14
PC 38:5	808.585	6608950	0.181067	866.592	255/329	16:0	22:5	866.627		622/648,662/688,702/628,742/768,782/808		7,10,13,16,19		0.874334	0.84748	0.874675	0.864111	0.839356		0.859991	0.0142874	0.0166134
PC 38:5	808.585	6608950	0.181067	866.592	255/329	16:0	22:5	866.627		580/606,620/646,660/686,700/726,740/766		4,7,10,13,16		0.125666	0.15252	0.125325	0.135889	0.160644		0.140009	0.0142874	0.102046
PC 38:5	808.585	6608950	0.181067	866.592	281/303	18:1	20:4	866.627	698/724	620/646,660/686,700/726,740/766	9	5,8,11,14		0.704981	0.659535	0.733691	0.697795	0.696334		0.698468	0.0236807	0.0339037
PC 38:5	808.585	6608950	0.181067	866.592	281/303	18:1	20:4	866.627	726/752	620/646,660/686,700/726,740/766	11	5,8,11,14		0.295019	0.340465	0.266309	0.302205	0.303666		0.301532	0.0236807	0.0785344
PC 38:4	810.601	1.21087e+07	0.331744	868.607	283/303	18:0	20:4	868.643	622/648,662/688,702/628,742/768			5,8,11,14
PC 38:4	810.601	1.21087e+07	0.331744	868.607	281/305	18:1	20:3	868.643	700/726	662/688,702/628,742/768	9	8,11,14		0.713572	0.624414	0.745899	0.685685	0.690161		0.691946	0.039954	0.0577414
PC 38:4	810.601	1.21087e+07	0.331744	868.607	281/305	18:1	20:3	868.643	728/754	662/688,702/628,742/768	11	8,11,14		0.286428	0.375586	0.254101	0.314315	0.309839		0.308054	0.039954	0.129698
PC 38:3	812.616	1.6637e+06	0.0455809	870.623	283/305	18:0	20:3	870.658	664/690,704/730,744/770			8,11,14		0.864116	0.847091	0.862149	0.866897	0.857266		0.859504	0.00695743	0.00809471
PC 38:3	812.616	1.6637e+06	0.0455809	870.623	283/305	18:0	20:3	870.658	622/648,662/688,702/728			5,8,11		0.135884	0.152909	0.137851	0.133103	0.142734		0.140496	0.00695743	0.0495205
PC 38:2	814.632	504902	0.0138329	872.639	279/311	18:2	20:0	872.674
PC 38:2	814.632	504902	0.0138329	872.639	283/307	18:0	20:2	872.674
PC 39:7	818.569	98100	0.00268767	876.576				876.611
PC 39:6	820.585	194696	0.00533415	878.592				878.627
PC 39:4	824.616	166000	0.00454795	882.623				882.658
PC 40:7	832.585	3175200	0.0869918	890.592	281/327	18:1	22:6	890.627	722/748	606/632,646/672,686/712,726/752,766/792,806/832	9	4,7,10,13,16,19		0.739847	0.690862	0.751834	0.738559	0.711538		0.726528	0.0221777	0.0305256
PC 40:7	832.585	3175200	0.0869918	890.592	281/327	18:1	22:6	890.627	750/776	606/632,646/672,686/712,726/752,766/792,806/832	11	4,7,10,13,16,19		0.260153	0.309138	0.248166	0.261441	0.288462		0.273472	0.0221777	0.081097
PC 40:6	834.601	4.07562e+06	0.111661	892.607	283/327	18:0	22:6	892.643	608/634,648/674,688/714,728/754,768/794,808/834			4,7,10,13,16,19
PC 40:4	838.632	260460	0.00713589	896.639	283/331	18:0	22:4	896.674		650/676,690/716,730/756,770/796		7,10,13,16
SM 34:2;O2	701.559	46500	0.0129888	759.566				759.601	661/687		n-4
SM 34:1;O2	703.575	1580000	0.441341	761.581	449	18:1;O2		761.617
SM 35:1;O2	717.591	22800	0.00636872	775.597				775.632
SM 36:2;O2	729.591	11400	0.00318436	787.597	447	18:2;O2		787.632	689/715		n-4
SM 36:1;O2	731.606	233000	0.0650838	789.613				789.648
SM 38:1;O2	759.637	15960	0.0044581	817.644	449	18:1;O2		817.679
SM 40:2;O2	785.653	592000	0.165363	843.66	449	18:1;O2		843.695	675/701		n-9			0.147042	0.139516	0.151705	0.135059	0.172814		0.149227	0.0131325	0.0880036
SM 40:2;O2	785.653	592000	0.165363	843.66	449	18:1;O2		843.695	703/729		n-7			0.852958	0.860484	0.848295	0.864941	0.827186		0.850773	0.0131325	0.015436
SM 40:2;O2	785.653	592000	0.165363	843.66	447	18:2;O2		843.695	745/771		n-4
SM 40:1;O2	787.669	3580000	1	845.675	449	18:1;O2		845.711
SM 42:3;O2	811.669	435000	0.121508	869.675		18:2;O2	24:1	869.711	701/727	771/797	n-9	n-4
SM 42:3;O2	811.669	435000	0.121508	869.675		18:2;O2	24:1	869.711	729/755	771/797	n-7	n-4
SM 42:3;O2	811.669	435000	0.121508	869.675		18:1;O2	24:2	869.711	703/729,743/769		n-9,n-6
SM 42:2;O2	813.684	2540000	0.709497	871.691	449	18:1;O2	24:1	871.726	703/729		n-9			0.974137	0.988323	0.992968	0.987081	0.987322		0.987576	0.000537723	0.000544488
SM 42:2;O2	813.684	2540000	0.709497	871.691	449	18:1;O2	24:1	871.726	731/757		n-7			0.025863	0.0147608	0.00703211	0.0129188	0.0126778		0.0134525	0.000930346	0.0691581
SM 42:2;O2	813.684	2540000	0.709497	871.691	447	18:2;O2	24:0	871.726	773/799		n-4
SM 42:1;O2	815.7	1478840	0.413084	873.707				873.742

## Sheet: Kidney
Subclass	Mass	[M-H]-	Neg peak	Fatty Acid 1	Fatty Acid 2	[MH+PB]+	Diagnostic Peak	Diagnostic Peak	Double Bond	Double Bond		Sample 1	Sample 2	Sample 3	Sample 4	Sample 5		Average	Variation	Coefficient of Variation	Highlight if CV > 20%
PE 32:1	690.507	688.492	253/255	16:0	16:1	748.549		439/465	7			0.528389	0.541118	0.515038	0.534303	0.571089		0.537987	0.0186433	0.0346539	Highlight if CV of technical repeats within 15%~25%
PE 32:1	690.507	688.492	253/255	16:0	16:1	748.549		467/493	9			0.471611	0.458882	0.484962	0.465697	0.428911		0.462013	0.0186433	0.0403525	Highlight if the data is discarded due to 1) CV of technical repeats > 25%; or 2) high deviation compared with other samples
PE P-34:2	700.528	698.513	364/337	16:0p	18:2	758.569
PE P-34:2	700.528	698.513	388/313	18:2p	16:0	758.569
PE P-34:1	702.543	700.529	364/339	16:0p	18:1	760.585
PE P-34:1	702.543	700.529	390/313	18:1p	16:0	760.585
PE 34:3	714.507	712.492	253/279	16:1	18:2	772.549	491/517	465/491, 505/531	9	9,12
PE 34:3	714.507	712.492	253/279	16:1	18:2	772.549	519/545	465/491, 505/531	11	9,12
PE 34:3	714.507	712.492	255/277	16:0	18:3	772.549		467/493,507/533,547/573		9,12,15
PE 34:2	716.522	714.508	255/279	16:0	18:2	774.564		467/493,507/533		9,12
PE 34:2	716.522	714.508	253/281	16:1	18:1	774.564	465/491	465/491	7	9
PE 34:2	716.522	714.508	253/281	16:1	18:1	774.564	493/519	493/519	9	11
PE 34:1	718.538	716.524	255/281	16:0	18:1	776.58		467/493		9		0.775011	0.772981	0.764403	0.758526	0.784399		0.771064	0.00892918	0.0115803
PE 34:1	718.538	716.524	255/281	16:0	18:1	776.58		495/521		11		0.224989	0.227019	0.235597	0.241474	0.215601		0.228936	0.00892918	0.039003
PE P-36:4	724.528	722.513	364/361	16:0p	20:4	782.569
PE P-36:4	724.528	722.513	388/337	18:2p	18:2	782.569
PE P-36:2	728.559	726.544	392/337	18:0p	18:2	786.601
PE P-36:2	728.559	726.544	390/339	18:1p	18:1	786.601
PE 35:2	730.538	728.524	269/279	17:0	18:2	788.58
PE O-36:2	730.575	728.56	281	16:1e	18:1	788.616
PE O-36:2	730.575	728.56	309	14:1e	20:1	788.616
PE 35:1	732.554	730.539	269/281	17:0	18:1	790.596
PE O-36:1	732.59	730.576	255/281	16:0	18:1	790.632
PE 36:5	738.507	736.492	253/303	16:1	20:4	796.549	515/541	409/435,449/475,489/515,529/555	9	5,8,11,14
PE 36:5	738.507	736.492	255/301	16:0	20:5	796.549
PE 36:5	738.507	736.492	277/279	18:3	18:2	796.549
PE P-37:5	738.507	736.492	378/361	17:0p	20:4	796.549
PE 36:5	738.507	736.492	277/279	18:3	18:2	796.549	451/477,491/517,531/557	489/515,529/555	9,12,15	9,12
PE 36:4	740.522	738.508	255/303	16:0	20:4	798.564	411/437,451/477,491/517,531/557			5,8,11,14
PE 36:4	740.522	738.508	279/279	18:2	18:2	798.564
PE 36:3	742.538	740.524	281/279	18:2	18:1	800.58	491/517	493/519,533/559	9,12	9		0.916529	0.909546	0.914512	0.91682	0.925224		0.916526	0.00507002	0.00553178
PE 36:3	742.538	740.524	281/279	18:2	18:1	800.58	519/545	493/519,533/559	9,12	11		0.083471	0.090454	0.0854883	0.0831804	0.0747756		0.0834739	0.00507002	0.0607378
PE 36:3	742.538	740.524	255/305	16:0	20:3	800.58	411/437,451/477,491/517			5,8,11		0.13791	0.146412	0.144829	0.141849	0.129688		0.140138	0.00597426	0.0426314
PE 36:3	742.538	740.524	255/305	16:0	20:3	800.58	453/479,493/519,533/559			8,11,14		0.86209	0.853588	0.855171	0.858151	0.870312		0.859862	0.00597426	0.00694793
PE 36:2	744.554	742.539	279/283	18:0	18:2	802.596		495/521,535/561		9,12
PE 36:2	744.554	742.539	281/281	18:1	18:1	802.596	493/519		9	9		0.867208	0.867304	0.866567	0.863167	0.878134		0.868476	0.00506121	0.00582769
PE 36:2	744.554	742.539	281/281	18:1	18:1	802.596	521/547		11	11		0.132792	0.132696	0.133433	0.136833	0.121866		0.131524	0.00506121	0.0384813
PE 36:1	746.569	744.555	281/283	18:0	18:1	804.611		495/521		9		0.878004	0.879593	0.891845	0.90999	0.910659		0.894018	0.0141509	0.0158284
PE 36:1	746.569	744.555	281/283	18:0	18:1	804.611		523/549		11		0.121996	0.120407	0.108155	0.0900103	0.0893415		0.105982	0.0141509	0.133522
PE P-38:6	748.528	746.513	364/385	16:0p	22:6	806.569
PE O-38:5	750.543	748.529				808.585
PE P-38:4	752.559	750.544	392/361	18:0p	20:4	810.601
PE 37:4	754.538	752.524	269/303	17:0	20:4
PE O-38:4	754.575	752.56	331	18:0e	20:4
PE 37:3	756.554	754.539	279/295	18:2	19:1
PE 37:2	758.569	756.555	279/297	18:2	19:0
PE P-39:6	762.543	760.529	378/385	17:0p	22:6
PE 38:7	762.507	760.492	253/327	16:1	22:6	820.549
PE P-39:5	764.559	762.544	378/385	17:0p	22:6
PE 38:6	764.522	762.508	255/327	16:0	22:6	822.564		/423,437/463,477/503,517/533,557/583,597/623		4,7,10,13,16,19
PE 38:6	764.522	762.508	279/303	18:2	20:4	822.564	515/541,555/581	435/461,475/501,515/541,555/581	9,12	5,8,11,14
PE 38:5	766.538	764.524	281/303	18:1	20:4	824.58	437/463,477/503,517/543,557/583	515/541	9	5,8,11,14		0.933078	0.914639	0.918061	0.92729	0.932059		0.925025	0.00742716	0.00802914
PE 38:5	766.538	764.524	281/303	18:1	20:4	824.58	437/463,477/503,517/543,557/583	543/569	11	5,8,11,14		0.0734286	0.0853608	0.0819389	0.07271	0.067941		0.0762758	0.00640154	0.0839262
PE 38:5	766.538	764.524	255/329	16:0	22:5	824.58		439/465,479/505,519/545,559/585,599/625		7,10,13,16,19
PE 38:4	768.554	766.539	283/303	18:0	20:4	826.596		439/465,479/505,519/545,559/585		5,8,11,14
PE P-40:8	772.528	770.513	398/385	18:2p	22:6	830.569
PE P-40:7	774.543	772.529	390/385	18:1p	22:6	832.585
PE P-40:6	776.559	774.544	392/385	18:0p	22:6	834.601
PE 39:4	782.569	780.555	297/303	19:0	20:4	840.611		453/479,493/519,533/559,573/599		5,8,11,14
PE 40:8	788.522
PE 40:7	790.538	788.524	281/327	18:1	22:6	848.58	539/565	423/449,463/489,503/529,543/569,583/609,623/649	9	4,7,10,13,16,19		0.937761	0.937448	0.943455	0.951567	0.944181		0.942882	0.00516143	0.0054741
PE 40:7	790.538	788.524	281/327	18:1	22:6	848.58	567/593	423/449,463/489,503/529,543/569,583/609,623/649	11	4,7,10,13,16,19		0.0622389	0.0625523	0.0565454	0.0484329	0.0558189		0.0571177	0.00516143	0.0903649
PE 40:6	792.554	790.539	283/327	18:0	22:6	850.596	425/451,465/491,505/531,545/571,585/611,625/651			4,7,10,13,16,19
PE 40:5	794.569	792.555	283/329	18:0	22:5	852.611		467/493,507/533,547/573,587/613,627/653		7,10,13,16,19		0.517347	0.546133	0.622348	0.589899	0.515942		0.558334	0.0417612	0.0747961
PE 40:5	794.569	792.555	283/329	18:0	22:5	852.611		425/451,465/491,505/531,545/571,585/611		4,7,10,13,16		0.482653	0.453867	0.377652	0.410101	0.484058		0.441666	0.0417612	0.0945538
PE 40:5	794.569	792.555	303/329	20:4	20:1	852.611	465/491,505/531,545/571,585/611	543/569	5,8,11,14	11		0.85246	0.799196	0.821239	0.843793	0.847342		0.832806	0.0199085	0.0239054
PE 40:5	794.569	792.555	303/329	20:4	20:1	852.611	465/491,505/531,545/571,585/611	571/597	5,8,11,14	13		0.14754	0.200804	0.178761	0.130973	0.152658		0.162147	0.0246805	0.152211
PE 40:4	796.585	794.571	283/331	18:0	22:4	854.627		467/493,507/533,547/573,587/613		7,10,13,16
PE 40:4	796.585	794.571	303/311	20:4	20:0	854.627	467/493,507/533,547/573,587/613		5,8,11,14
PC 30:1	704.522	762.529	227/253	14:0	16:1	762.564
PC O-32:1	718.575	776.581	255/253	16:1	16:0	776.616	608/634		7			0.217944	0.235088	0.220819	0.201174	0.240225		0.22305	0.0137806	0.0617825
PC O-32:1	718.575	776.581	255/253	16:1	16:0	776.616	636/662		9			0.782056	0.764912	0.779181	0.798826	0.759775		0.77695	0.0137806	0.0177368
PC 32:2	730.538	788.545	227/279	14:0	18:2	788.58	622/648,662/688			9,12
PC 32:2	730.538	788.545	251/255	16:2	16:0	788.58	622/648,662/688			7,10
PC 32:2	730.538	788.545	253/253	16:1	16:1	788.58	620/646		7	7		0.332416	0.505422	0.390149	0.390501	0.403333		0.404364	0.0561865	0.13895
PC 32:2	730.538	788.545	253/253	16:1	16:1	788.58	648/674		9	9		0.667584	0.494578	0.609851	0.609499	0.596667		0.595636	0.0561865	0.0943303
PC 32:1	732.554	790.56	253/255	16:0	16:1	790.596	678/704		11			0.0397197	0.0414697	0.0394827	0.0356561	0.045328		0.0403312	0.00313734	0.0777893
PC 32:1	732.554	790.56	253/255	16:0	16:1	790.596	650/676		9			0.662255	0.63522	0.659452	0.677661	0.630864		0.65309	0.0175585	0.0268853
PC 32:1	732.554	790.56	253/255	16:0	16:1	790.596	622/648		7			0.230594	0.24025	0.23245	0.228874	0.247227		0.235879	0.00687968	0.0291661
PC 32:1	732.554	790.56	253/255	16:0	16:1	790.596	608/634		6			0.0674321	0.0830601	0.0686156	0.0578088	0.0765806		0.0706995	0.00858557	0.121438
PC 33:4	740.522	798.529				798.564
PC O-34:4	740.559	798.565				798.601
PC O-34:3	742.575	800.581	253/279	16:1	18:2	800.616
PC O-34:3	742.575	800.581	255/277	16:0	18:3	800.616
PC 33:3	742.538	800.545				800.58
PC O-34:2	744.59	802.597	255/279	16:0	18:2	802.632	636/662,676/702			9,12
PC O-34:2	744.59	802.597	253/281	16:1	18:1	802.632	634/660		7	9
PC O-34:2	744.59	802.597	253/281	16:1	18:1	802.632	662/688		9	11
PC 33:2	744.554	802.56
PC O-34:1	746.606	804.612	255/281	16:0	18:1	804.648	636/662			9		0.930201	0.925062	0.925834	0.922435	0.931903		0.927087	0.00346985	0.00374275
PC O-34:1	746.606	804.612	255/281	16:0	18:1	804.648	664/690			11		0.0697994	0.0749382	0.0741657	0.0775653	0.0680974		0.0729132	0.00346985	0.0475888
PC 33:1	746.569	804.576	267/255	16:0	17:1	804.611	650/676			9
PC 34:3	756.554	814.56	255/277	16:0	18:3	814.596
PC 34:3	756.554	814.56	253/279	16:1	18:2	814.596
PC 34:2	758.569	816.576	255/279	16:0	18:2	816.611
PC 34:1	760.585	818.592	255/281	16:0	18:1	818.627	650/676		9			0.621325	0.621325	0.603517	0.607434	0.615983		0.613917	0.00726921	0.0118407
PC 34:1	760.585	818.592	255/281	16:0	18:1	818.627	678/704		11			0.378675	0.378675	0.396483	0.392566	0.384017		0.386083	0.00726921	0.0188281
PC O-36:6	764.559	822.565				822.601
PC O-36:5	766.575	824.581	303	16:1e	20:4	824.616
PC O-36:4	768.59	826.597	255/303	16:0	20:4	826.632	580/606,620/646,660/686,700/726			5,8,11,14
PC O-36:4	768.59	826.597	279/279	18:2e	18:2	826.632
PC 37:4	768.554	826.56				826.596
PC O-36:3	770.606	828.612	281/279	18:1	18:2	828.648	660/686	662/688,702/728	9	9,12
PC O-36:3	770.606	828.612	255/305	16:0	20:3	828.648	622/648,662/688,702/728		8,11,14
PC 35:2	772.585	830.592	269/279	17:0	18:2	830.627	664/690,704/730
PC 35:2	772.585	830.592	267/281	17:1	18:1	830.627
PC O-36:2	772.621	830.628	279/283	18:0	18:2	830.663
PC O-36:2	772.621	830.628	281/281	18:1e	18:1	830.663
PC 35:1	774.601	832.607	269/281	17:0	18:1	832.643	664/690
PC 35:1	774.601	832.607	269/281	17:0	18:1	832.643	692/718
PC 35:1	774.601	832.607	255/295	16:0	19:1	832.643	678/704
PC 35:1	774.601	832.607	255/295	16:0	19:1	832.643	650/676
PC 36:5	780.554	838.56	255/301	16:0	20:5	838.596	594/620,634/660,674/700,714/740,754/780			5,8,11,14,17
PC 36:5	780.554	838.56	253/303	16:1	20:4	838.596	698/724	592/618,632/658,672/698,712/738	9	5,8,11,14
PC 36:4	782.569	840.576	255/303	16:0	20:4	840.611	594/620,634/660,674/700,714/740			5,8,11,14
PC 36:3	784.585	842.592	279/281	18:2	18:1	842.627	676/702,716/742	674/700	9,12	9		0.799808	0.792276	0.786436	0.794145	0.804353		0.795404	0.0061849	0.0077758
PC 36:3	784.585	842.592	279/281	18:2	18:1	842.627	676/702,716/742	702/728	9,12	11		0.200192	0.207724	0.213564	0.205855	0.195647		0.204596	0.0061849	0.0302298
PC 36:3	784.585	842.592	255/305	16:0	20:3	842.627	636/662,676/702,716/742			8,11,14
PC 36:2	786.601	844.607	203/279	18:2	18:0	844.643	678/704,718/744			9,12
PC 36:2	786.601	844.607	281/281	18:1	18:1	844.643	676/702		9	9		0.807715	0.799056	0.791349	0.801409	0.801429		0.800192	0.00527425	0.00659123
PC 36:2	786.601	844.607	281/281	18:1	18:1	844.643	704/730		11	11		0.192285	0.200944	0.208651	0.198591	0.198571		0.199808	0.00527425	0.0263966
PC 36:1	788.616	846.623	281/283	18:0	18:1	846.658	678/704			9		0.73694	0.730603	0.764838	0.766111	0.773866		0.754472	0.0172984	0.0229278
PC 36:1	788.616	846.623	281/283	18:0	18:1	846.658	706/732			11		0.26306	0.269397	0.235162	0.233889	0.226134		0.245528	0.0172984	0.0704537
PC O-38:6	792.59	850.597	327	16:0e	22:6	850.632
PC 37:4	796.585	854.592	269/303	17:0	20:4	854.627	608/634,648/674,688/704,728/754			5,8,11,14
PC O-38:4	796.621	854.628	331	16:0e	22:4	854.663
PC O-38:4	796.621	854.628	283/303	18:0	20:4	854.663
PC 37:2	800.616	858.623	279/297	18:2	19:0	858.658
PC 38:7	804.554	862.56	253/327	16:1	22:6	862.596	694/720	578/604,618/644,658/684,698/724,738/764,778/804	7	4,7,10,13,16,19
PC 38:7	804.554	862.56	253/327	16:1	22:6	862.596	722/748	578/604,618/644,658/684,698/724,738/764,778/804	9	4,7,10,13,16,19
PC 38:6	806.569	864.576	255/327	16:0	22:6	864.611	580/606,620/646,660/686,700/726,740/766,780/806			4,7,10,13,16,19
PC 38:5	808.585	866.592	281/303	18:1	20:4	866.627	698/724	620/646,660/686,700/726,740/766	9	5,8,11,14		0.870466	0.858016	0.854718	0.867483	0.860693		0.862275	0.00586472	0.00680145
PC 38:5	808.585	866.592	281/303	18:1	20:4	866.627	726/752	620/646,660/686,700/726,740/766	11	5,8,11,14		0.129534	0.141984	0.145282	0.132517	0.139307		0.137725	0.00586472	0.0425829
PC 38:5	808.585	866.592	255/329	16:0	22:5	866.627	622/648,662/688,702/628,742/768,782/808			7,10,13,16,19
PC 38:4	810.601	868.607	283/303	18:0	20:4	868.643		622/648,662/688,702/628,742/768		5,8,11,14
PC 38:3	812.616	870.623	283/305	18:0	20:3	870.658		664/690,704/730,744/770		8,11,14
PC O-40:9	814.575
PC O-40:8	816.59	874.597				874.632
PC O-40:7	818.606	876.612	327	18:1e	22:6	876.648
PC O-40:6	820.621	878.628	327	18:0e	22:6	878.663
PC O-40:6	820.621	878.628	329	18:1e	22:5	878.663
PC 39:4	824.616	882.623	297/303	19:0	20:4	882.658
PC 40:8	830.569	888.576				888.611
PC 40:7	832.585	890.592	281/327	18:1	22:6	890.627
PC 40:6	834.601	892.607	283/327	18:0	22:6	892.643		608/634,648/674,688/714,728/754,768/794,808/834		4,7,10,13,16,19
PC 40:5	836.616	894.623	283/329	18:0	22:5	894.658	650/676,690/716,730/756,770/796,810/836			7,10,13,16,19		0.797806	0.773903	0.76782	0.753731	0.778002		0.774252	0.0143631	0.0185509
PC 40:5	836.616	894.623	283/329	18:0	22:5	894.658	608/634,648/674,688/714,728/754,768/794			4,7,10,13,16		0.202194	0.226097	0.23218	0.246269	0.221998		0.225748	0.0143631	0.0636245
PC 40:5	836.616	894.623	303/309	20:4	20:1	894.658	648/674,688/714,728/754,768/794	726/752	5,8,11,14	11		0.768121	0.721747	0.74004	0.747634	0.759461		0.7474	0.0160444	0.0214669
PC 40:5	836.616	894.623	303/309	20:4	20:1	894.658	648/674,688/714,728/754,768/794	754/780	5,8,11,14	13		0.231879	0.278253	0.25996	0.252366	0.240539		0.2526	0.0160444	0.0635172
PC 40:4	838.632	896.639	283/331	18:0	22:4	896.674		650/676,690/716,730/756,770/796
PC 40:4	838.632	896.639	303/311	20:4	20:0	896.674	650/676,690/716,730/756,770/796		5,8,11,14
SM 33:1;O2	689.559	747.566	449	18:1;O2	15:0	747.601
SM 34:2;O2	701.559	759.566	447	18:2;O2	16:0	759.601	661/687		n-4
SM 34:1;O2	703.575	761.581	449	18:1;O2	16:0	761.617
SM 36:2;O2	729.591	787.597		18:2;O2	18:0	787.632	689/715		n-4
SM 36:1;O2	731.606	789.613				789.648
SM 38:2;O2	757.622	815.628		18:2;O2	20:0	815.664	717/743		n-4
SM 38:1;O2	759.637	817.644				817.679
SM 39:1;O2	773.653	831.66				831.695
SM 39:1;O2	773.653	831.66				831.695
SM 40:2;O2	785.653	843.66		18:1;O2	22:1	843.695	745/771		n-7
SM 40:1;O2	787.669	845.675	449	18:1;O2	22:0	845.711
SM 42:3;O2	811.669	869.675	447	18:2;O2	24:1	869.711	701/727	771/797	n-9	n-4
SM 42:3;O2	811.669	869.675	449	18:1;O2	24:2	869.711	703/729,743/769		n-6, n-9
SM 42:2;O2	813.684	871.691	449	18:1;O2	24:1	871.726	703/729		n-9			0.99787	0.996707	0.997307	0.99787	0.998218		0.997411	0.000620989	0.000622601
SM 42:2;O2	813.684	871.691	449	18:1;O2	24:1	871.726	731/757		n-7			0.00213001	0.00329261	0.00269334	0.00213001	0.0017822		0.00258938	0.000620989	0.239822
SM 42:2;O2	813.684	871.691	447	18:2;O2	24:0	871.726	773/799		n-4
SM 42:1;O2	815.7	873.707	449	18:1;O2	24:0	873.742

## Sheet: Cerebellum
Subclass	Mass	[M-H]-/[M+OAc]-	FFA Peak	Fatty acid 1	Fatty acid 2	[MH+PB]+	Diagnostic Peak	Diagnostic Peak	Double Bond	Double Bond		Sample 1	Sample 2	Sample 3	Sample 4	Sample 5		Average	Variation	Coefficient of Variation	Highlight if CV > 20%
PE 32:1	690.507	690.507	253/255	16:1	16:0	690.507															Highlight if CV of technical repeats within 15%~25%
PE P-34:2	700.528	700.528	390/311	18:1p	16:1	700.528															Highlight if the data is discarded due to 1) CV of technical repeats > 25%; or 2) high deviation compared with other samples
PE P-34:2	700.528	700.528	364/337	16:0p	18:2	700.528
PE P-34:1	702.543	702.543	364/339	16:0p	18:1	702.543
PE P-34:1	702.543	702.543	390/313	18:1p	16:0	702.543
PE 33:1	704.522	704.522				704.522
PE O-35:3	714.543	714.543	267/279	17:1	18:2	714.543
PE 34:3	714.507	714.507	253/279	16:1	18:2	714.507
PE P-35:1	716.559	716.559	378/339	17:0p	18:1	716.559
PE 34:2	716.522	716.522	253/281	16:1	18:1	716.522	465/491	465/491	7	9
PE 34:2	716.522	716.522	253/281	16:1	18:1	716.522	493/519	493/519	9	11
PE 34:2	716.522	716.522	255/279	16:0	18:2	716.522	467/493,507/533			9,12
PE 34:1	718.538	718.538	255/281	16:0	18:1	718.538	467/493			9		0.792551	0.784517	0.811075	0.79735	0.795131		0.796125	0.00864329	0.0108567
PE 34:1	718.538	718.538	255/281	16:0	18:1	718.538	495/521			11		0.207449	0.215483	0.188925	0.20265	0.204869		0.203875	0.00864329	0.042395
PE P-36:4	724.528	724.528	364/361	16:0p	20:4	724.528
PE O-36:4	726.543	726.543	305	16:1e	20:3	726.543		437/463,477/503,517/543		8,11,14
PE O-36:4	726.543	726.543	303	16:0e	20:4	726.543		/423,437/463,477/503,517/543		5,8,11,14
PE O-36:4	726.543	726.543	279/279	18:2e	18:2	726.543	477/503,517/543	477/503,517/543	9,12	9,12
PE P-36:2	728.559	728.559	390/339	18:1p	18:1	728.559
PE P-36:1	730.575	730.575	392/339	18:0p	18:1	730.575
PE P-36:1	730.575	730.575	364/367	16:0p	20:1	730.575
PE O-37:5	738.543	738.543				738.543
PE 36:5	738.507	738.507	253/303	16:1	20:4	738.507	515/541	409/435,449/475,489/515,529/555	9	5,8,11,14
PE O-37:4	740.559	740.559				740.559
PE 36:4	740.522	740.522	255/303	16:0	20:4	740.522		411/437,451/477,491/517,531/557		5,8,11,14
PE O-37:3	742.575	742.575	279/295	18:2	19:1	742.575
PE 36:3	742.538	742.538	281/279	18:1	18:2	742.538	491/517	493/519,533/559	9,12	9		0.592212	0.552368	0.466766	0.507518	0.575884		0.53895	0.0459987	0.0853489
PE 36:3	742.538	742.538	281/279	18:1	18:2	742.538	519/545	493/519,533/559	9,12	11		0.407788	0.447632	0.533234	0.492482	0.424116		0.46105	0.0459987	0.0997694
PE 36:3	742.538	742.538	255/305	16:0	20:3	742.538	411/437,451/477,491/517			5,8,11
PE 36:3	742.538	742.538	255/305	16:0	20:3	742.538	453/479,493/519,533/559			8,11,14
PE O-37:2	744.554	744.554				744.554
PE 36:2	744.554	744.554	281/281	18:1	18:1	744.554	493/519		9	9		0.822925	0.825083	0.807934	0.817452	0.825598		0.819798	0.00659686	0.00804693
PE 36:2	744.554	744.554	281/281	18:1	18:1	744.554	521/547		11	11		0.177075	0.174917	0.192066	0.182548	0.174402		0.180202	0.00659686	0.0366082
PE 36:1	746.567	746.567	281/283	18:0	18:1	746.567	495/521			9		0.871679	0.867919	0.886285	0.87617	0.87734		0.875879	0.0061889	0.00706593
PE 36:1	746.567	746.567	281/283	18:0	18:1	746.567	523/549			11		0.128321	0.132081	0.113715	0.12383	0.12266		0.124121	0.0061889	0.0498617
PE 36:1	746.567	746.567	255/309	16:0	20:1	746.567	495/521			11
PE 36:1	746.567	746.567	255/309	16:0	20:1	746.567	523/549			13
PE P-38:6	748.528	748.528	364/385	16:0p	22:6	748.528
PE P-38:5	750.543	750.543	390/361	18:1p	20:4	750.543
PE P-38:4	752.559	752.559	392/361	18:0p	20:4	752.559
PE P-38:2	756.59	756.59	390/367	18:1p	20:1	756.59
PE P-38:1	758.606	758.606	392/367	18:0p	20:1	758.606
PE 38:6	764.522	764.522	255/327	16:0	22:6	764.522	/423,437/463,477/503,517/533,557/583,597/623
PE 38:5	766.538	766.538	281/303	18:1	20:4	766.538	515/541	437/463,477/503,517/543,557/583	9	5,8,11,14		0.803256	0.797275	0.775092	0.792132	0.802508		0.794053	0.0102934	0.0129631
PE 38:5	766.538	766.538	281/303	18:1	20:4	766.538	543/569	437/463,477/503,517/543,557/583	11	5,8,11,14		0.196744	0.202725	0.224908	0.207868	0.197492		0.205947	0.0102934	0.0499805
PE 38:4	768.554	768.554	283/303	18:0	20:4	768.554		439/465,479/505,519/545,559/585		5,8,11,14
PE 38:4	768.554	768.554	255/331	16:0	22:4	768.554		439/465,479/505,519/545,559/585		7,10,13,16
PE 38:3	770.569	770.569	283/305	18:0	20:3	770.569		439/465,479/505,519/545		5,8,11
PE 38:3	770.569	770.569	283/305	18:0	20:3	770.569		481/507,521/547,561/587		8,11,14
PE 38:3	770.569	770.569	281/307	18:1	20:2	770.569	519/545	521/547,561/587	9	9,12		0.763803	0.775785	0.724721	0.750998	0.771165		0.757294	0.0183156	0.0241856
PE 38:3	770.569	770.569	281/307	18:1	20:2	770.569	547/573	521/547,561/587	11	9,12		0.236197	0.224215	0.275279	0.249002	0.228835		0.242706	0.0183156	0.0754642
PE 38:2	772.585	772.585		18:1	20:1	772.585	521/547	521/547	9	11
PE 38:2	772.585	772.585		18:1	20:1	772.585	549/575	549/575	11	13
PE P-40:7	774.543	774.543	390/385	18:1p	22:6	774.543
PE 38:1	774.601	774.601	283/309	18:0	20:1	774.601		523/549		11		0.8721	0.872245	0.860495	0.869692	0.865755		0.868057	0.00445093	0.00512746
PE 38:1	774.601	774.601	283/309	18:0	20:1	774.601		551/577		13		0.1279	0.127755	0.139505	0.130308	0.134245		0.131943	0.00445093	0.0337338
PE P-40:6	776.559	776.559	392/385	18:0p	22:6	776.559
PE P-40:4	780.59	780.59	392/389	18:0p	22:4	780.59
PE 39:2	786.601	786.601				786.601
PE 39:1	788.616	788.616		19:0	20:1	788.616		537/563		11
PE 40:6	792.554	792.554	283/327	18:0	22:6	792.554	425/451,465/491,505/531,545/571,585/611,625/651
PE 40:4	796.621	796.621	283/331	22:4	18:0	796.621	467/493,507/533,547/573,587/613
PC O-31:2	702.543	702.543				702.543
PC 31:1	718.538	718.538				718.538
PC O-32:1	718.575	718.575	253/255	16:0	16:1	718.575		636/662		9
PC O-33:3	728.559	728.559				728.559
PC 32:3	728.522	728.522				728.522
PC O-33:2	730.575	730.575				730.575
PC 32:2	730.538	730.538		16:1	16:1	730.538	620/646	620/646	7	7
PC 32:2	730.538	730.538		16:1	16:1	730.538	648/674	648/674	9	9
PC 32:1	732.554	732.554	253/255	16:1	16:0	732.554	678/704		11			0.0337855	0.0278555	0.0304435	0.0355454	0.0362052		0.032767	0.00316544	0.0966043
PC 32:1	732.554	732.554	253/255	16:1	16:0	732.554	650/676		9			0.617782	0.609593	0.61889	0.618433	0.599733		0.612886	0.00741109	0.0120921
PC 32:1	732.554	732.554	253/255	16:1	16:0	732.554	622/648		7			0.273158	0.27978	0.263934	0.262603	0.276107		0.271116	0.00675549	0.0249173
PC 32:1	732.554	732.554	253/255	16:1	16:0	732.554	608/634		6			0.0752753	0.0827717	0.0867321	0.0834184	0.0879543		0.0832304	0.0044296	0.053221
PC 33:4	740.522	740.522				740.522
PC O-34:3	742.575	742.575				742.575
PC O-34:2	744.59	744.59	255/279	16:0	18:2	744.59
PC O-34:2	744.59	744.59	253/281	16:1	18:1	744.59	634/660	634/660	7	9
PC O-34:2	744.59	744.59	253/281	16:1	18:1	744.59	662/688	662/688	9	11
PC 33:2	744.554	744.554				744.554
PC O-34:1	746.606	746.606	255/281	16:0	18:1	746.606	636/662			9		0.785428	0.785384	0.786606	0.788231	0.790213		0.787172	0.00184016	0.00233768
PC O-34:1	746.606	746.606	255/281	16:0	18:1	746.606	664/690			11		0.214572	0.214616	0.213394	0.211769	0.209787		0.212828	0.00184016	0.00864625
PC 33:1	746.569	746.569	255/267	16:0	17:1	746.569	650/676			9		0.884886	0.896297	0.908897	0.884039	0.874453		0.889714	0.0118299	0.0132963
PC 33:1	746.569	746.569	255/267	16:0	17:1	746.569	678/704			11		0.115114	0.103703	0.0911033	0.115961	0.125547		0.110286	0.0118299	0.107266
PC 34:2	758.569	758.569	255/279	16:0	18:2	758.569	650/676,690/716			9,12
PC 34:2	758.569	758.569	253/281	16:1	18:1	758.569	648/674		7	9
PC 34:2	758.569	758.569	253/281	16:1	18:1	758.569	676/702		9	11
PC 34:1	760.585	760.585	255/281	16:0	18:1	760.585	650/676			9		0.673108	0.677412	0.693373	0.684489	0.686778		0.683032	0.00711564	0.0104177
PC 34:1	760.585	760.585	255/281	16:0	18:1	760.585	678/704			11		0.326507	0.322261	0.30636	0.315237	0.312958		0.316664	0.00707322	0.0223366
PC 34:1	760.585	760.585	255/281	16:0	18:1	760.585	706/732			13		0.000384942	0.000327396	0.0002671	0.000273902	0.000263926		0.000303453	4.68422e-05	0.154364
PC O-36:4	768.554	768.554	255/303	16:0	20:4	768.554		580/606,620/646,660/686,700/726		5,8,11,14
PC 35:4	768.554	768.554				768.554
PC O-36:2	772.621	772.621	279/283	18:0	18:2	772.621
PC O-36:2	772.621	772.621	255/307	16:0	20:2	772.621
PC O-36:2	772.621	772.621	281/281	18:1	18:1	772.621	662/688		9	9		0.699962	0.71124	0.675626	0.665544	0.682335		0.686941	0.0165352	0.0240708
PC O-36:2	772.621	772.621	281/281	18:1	18:1	772.621	690/716		11	11		0.300038	0.28876	0.324374	0.334456	0.317665		0.313059	0.0165352	0.0528184
PC 35:2	772.621	772.621	267/281	17:1	18:1	772.621	676/702		9	10
PC 35:2	772.621	772.621	267/281	17:1	18:1	772.621	704/730		11	12
PC 35:1	774.595	774.595	269/281	17:0	18:1	774.595		664/690		9		0.692824	0.68955	0.721128	0.707916	0.700799		0.702443	0.0113186	0.0161131
PC 35:1	774.595	774.595	269/281	17:0	18:1	774.595		692/718		11		0.307176	0.31045	0.278872	0.292084	0.299201		0.297557	0.0113186	0.0380383
PC 35:1	774.595	774.595	255/295	16:0	19:1	774.595		678/704		9		0.956137	0.965301	0.960304	0.962454	0.945558		0.957951	0.00688068	0.00718271
PC 35:1	774.595	774.595	255/295	16:0	19:1	774.595		706/732		11		0.0438634	0.0346988	0.039696	0.0375463	0.0544421		0.0420493	0.00688068	0.163634
PC O-36:1	774.595	774.595	281/283	18:0	18:1	774.595		664/690		9
PC O-36:1	774.595	774.595	255/309	16:0	20:1	774.595		692/718		11
PC 36:5	780.554	780.554	255/301	16:0	20:5	780.554		594/620,634/660,674/700,714/740,754/780		5,8,11,14,17
PC 36:5	780.554	780.554	253/303	16:1	20:4	780.554	698/724	592/618,632/658,672/698,712/738	9	5,8,11,14
PC 36:4	782.569	782.569	255/303	16:0	20:4	782.569	594/620,634/660,674/700,714/740
PC 36:3	784.585	784.585	255/305	16:0	20:3	784.585	636/662,676/702,716/742			8,11,14
PC 36:3	784.585	784.585	279/281	18:2	18:1	784.585	676/702,716/742	674/700	9,12	9		0.62338	0.627703	0.613691	0.622381	0.625895		0.62261	0.00483562	0.0077667
PC 36:3	784.585	784.585	279/281	18:2	18:1	784.585	676/702,716/742	702/728	9,12	11		0.37662	0.372297	0.386309	0.377619	0.374105		0.37739	0.00483562	0.0128133
PC 36:2	786.601	786.601	281/281	18:1	18:1	786.601	676/702		9	9		0.669321	0.671032	0.670941	0.67211	0.674418		0.671564	0.00168199	0.00250459
PC 36:2	786.601	786.601	281/281	18:1	18:1	786.601	704/730		11	11		0.330679	0.328968	0.329059	0.32789	0.325582		0.328436	0.00168199	0.00512122
PC 36:2	786.601	786.601	255/307	16:0	20:2	786.601	636/662,676/702			8,11
PC 36:2	786.601	786.601	279/283	18:0	18:2	786.601	678/704,718/744			9,12
PC 36:1	788.616	788.616	281/283	18:0	18:1	788.616	678/704			9		0.78147	0.780731	0.799971	0.796436	0.795093		0.79074	0.00803377	0.0101598
PC 36:1	788.616	788.616	281/283	18:0	18:1	788.616	706/732			11		0.21853	0.219269	0.200029	0.203564	0.204907		0.20926	0.00803377	0.0383913
PC 36:1	788.616	788.616	255/309	16:0	20:1	788.616	678/704			11
PC 36:1	788.616	788.616	255/309	16:0	20:1	788.616	706/732			13
PE O-38:6	792.59	792.59	255/327	16:0	22:6	792.59
PC 37:6	792.554	792.554				792.554
PC O-38:4	796.621	796.621	283/303	18:0	20:4	796.621
PC 37:4	796.585	796.585	269/303	17:0	20:4	796.585		608/634,648/674,688/704,728/754		5,8,11,14
PC O-38:3	798.637	798.637				798.637
PC O-38:2	800.653	800.653				800.653
PC 37:2	800.616	800.616				800.616
PC 37:1	802.632	802.632				802.632
PC 38:7	804.554	804.554	253/327	16:1	22:6	804.554	694/720	578/604,618/644,658/684,698/724,738/764,778/804	7	4,7,10,13,16,19		0.684856	0.679774	0.702016	0.692812	0.690035		0.689899	0.00752689	0.0109101
PC 38:7	804.554	804.554	253/327	16:1	22:6	804.554	722/748	578/604,618/644,658/684,698/724,738/764,778/804	9	4,7,10,13,16,19		0.315144	0.320226	0.297984	0.307188	0.309965		0.310101	0.00752689	0.0242723
PC 38:6	806.569	806.569	255/327	16:0	22:6	806.569	580/606,620/646,660/686,700/726,740/766,780/806			4,7,10,13,16,19
PC 38:5	808.585	808.585	281/303	18:1	20:4	808.585	698/724	620/646,660/686,700/726,740/766	9	5,8,11,14		0.798614	0.797621	0.77906	0.800669	0.802222		0.795637	0.00844138	0.0106096
PC 38:5	808.585	808.585	281/303	18:1	20:4	808.585	726/752	620/646,660/686,700/726,740/766	11	5,8,11,14		0.201386	0.202379	0.22094	0.199331	0.197778		0.204363	0.00844138	0.0413059
PC 38:4	810.601	810.601	283/303	18:0	20:4	810.601		622/648,662/688,702/628,742/768		5,8,11,14
PC 38:4	810.601	810.601	283/303	16:0	22:4	810.601		622/648,662/688,702/628,742/768		7,10,13,16
PC 38:3	812.616	812.616		18:0	20:3	812.616		664/690,704/730,744/770		8,11,14
PC 38:2	814.632	814.632	281/309	18:1	20:1	814.632	704/730		9	11
PC 38:2	814.632	814.632	281/309	18:1	20:1	814.632	732/758		11	13
PC 38:2	814.632	814.632	283/307	18:0	20:2	814.632	664/690,704/730			8,11
PC 38:1	816.648	816.648	283/309	18:0	20:1	816.648
PC 38:1	816.648	816.648	281/311	18:1	20:0	816.648
PC 40:7	832.585	832.585	281/327	18:1	22:6	832.585	722/748	606/632,646/672,686/712,726/752,766/792,806/832	9	4,7,10,13,16,19		0.812171	0.819303	0.79974	0.81266	0.810179		0.810811	0.0063301	0.00780712
PC 40:7	832.585	832.585	281/327	18:1	22:6	832.585	750/776	606/632,646/672,686/712,726/752,766/792,806/832	11	4,7,10,13,16,19		0.187829	0.180697	0.20026	0.18734	0.189821		0.189189	0.0063301	0.033459
PC 40:6	834.601	834.601	283/327	18:0	22:6	834.601		608/634,648/674,688/714,728/754,768/794,808/834		4,7,10,13,16,19
PC 40:4	838.632	838.632	283/331	18:0	22:4	838.632		650/676,690/716,730/756,770/796		7,10,13,16
PC 40:4	838.632	838.632	303/311	20:4	20:0	838.632	650/676,690/716,730/756,770/796		5,8,11,14
PC 40:3	840.648	840.648				840.648
PC 40:2	842.663	842.663				842.663
PC 40:1	844.679	844.679	281/339	18:1	22:0	902.68
SM 34:1;O2	703.575	703.575	449	18:1;O2	16:0	703.575
SM 36:2;O2	729.591	729.591	447	18:2;O2	18:0	729.591	689/715		n-4
SM 36:1;O2	731.606	731.606	449	18:1;O2	18:0	731.606
SM 38:1;O2	759.637	759.637	449	18:1;O2	20:0	759.637
SM 40:3;O2	783.64	783.64				783.64
SM 40:2;O2	785.653	785.653	449	18:1;O2	22:1	785.653	703/729		n-7
SM 40:1;O2	787.669	787.669	449	18:1;O2	22:0	787.669
SM 41:2;O2	799.669	799.669				799.669	689/715		n-9
SM 41:2;O2	799.669	799.669				799.669	717/743		n-7
SM 41:1;O2	801.684	801.684				801.684
SM 42:3;O2	811.669	811.669	449	18:1;O2	24:2	811.669	703/729,743/769		n-6, n-9
SM 42:3;O2	811.669	811.669		18:2;O2	24:1	811.669	771/797	701/727	n-4	n-9		0.936377	0.941845	0.911421	0.925133	0.982663		0.928694	0.0116512	0.0125458
SM 42:3;O2	811.669	811.669		18:2;O2	24:1	811.669	771/797	729/755	n-4	n-7		0.0636231	0.058155	0.0885788	0.0748668	0.017337		0.0713059	0.0116512	0.163398
SM 42:2;O2	813.684	813.684	449	18:1;O2	24:1	813.684	703/729		n-9			0.964937	0.96648	0.963424	0.967346	0.971187		0.966675	0.00262416	0.00271463
SM 42:2;O2	813.684	813.684	449	18:1;O2	24:1	813.684	731/757		n-7			0.0350633	0.0335201	0.0365757	0.0326541	0.0321613		0.0339949	0.00162402	0.0477723
SM 42:1;O2	815.7	815.7				815.7	705/731		n-9

## Sheet: Hippocampus
Subclass	Mass	[M-H]-/[M+OAc]-	FFA Peak	Fatty Acid 1	Fatty Acid 2	[MH+PB]+	Diagnostic Peak	Diagnostic Peak	Double Bond	Double Bond		Sample 1	Sample 2	Sample 3	Sample 4	Sample 5		Average	Variation	Coefficient of Variation	Highlight if CV > 20%
PE 32:1	690.507	688.492	253/255	16:1	16:0	748.549															Highlight if CV of technical repeats within 15%~25%
PE O-34:2	700.528	698.513	255/279	16:0	18:2	758.569															Highlight if the data is discarded due to 1) CV of technical repeats > 25%; or 2) high deviation compared with other samples
PE O-34:2	700.528	698.513	253/281	16:1	18:1	758.569
PE P-34:1	702.543	700.529	364/339	16:0p	18:1	760.585
PE P-34:1	702.543	700.529	390/313	18:1p	16:0	760.585
PE O-34:1	704.559	702.544				762.601
PE 34:2	716.522	714.508	253/281	16:1	18:1	774.564	465/491	465/491	7	9
PE 34:2	716.522	714.508	253/281	16:1	18:1	774.564	493/519	493/519	9	11
PE 34:2	716.522	714.508	255/279	16:0	18:2	774.564		467/493,507/533		9,12
PE 34:1	718.538	716.524	255/281	16:0	18:1	776.58		467/493		9		0.808848	0.795552	0.800019	0.806226	0.803652		0.802859	0.00467535	0.00582337
PE 34:1	718.538	716.524	255/281	16:0	18:1	776.58		495/521		11		0.191152	0.204448	0.199981	0.193774	0.196348		0.197141	0.00467535	0.0237158
PE P-36:4	724.528	722.513	364/361	16:0p	20:4	782.569
PE O-36:4	726.543	724.529	303	16:0e	20:4	784.585
PE O-36:4	726.543	724.529	279/279	18:2e	18:2	784.585
PE P-36:2	728.559	726.544	390/339	18:1p	18:1	786.601
PE P-36:2	730.575	728.56	392/339	18:0p	18:1	788.616
PE P-36:2	730.575	728.56	364/367	16:0p	20:1	788.616
PE 36:5	738.507	736.492	253/303	16:1	20:4	796.549
PE 36:4	740.522	738.508	255/303	16:0	20:4	798.564		411/437,451/477,491/517,531/557		5,8,11,14
PE 36:3	742.538	740.524	279/281	18:1	18:2	800.58	491/517	493/519,533/559	9	9,12		0.779835	0.76528	0.732787	0.754836	0.748035		0.756155	0.0158602	0.0209748
PE 36:3	742.538	740.524	279/281	18:1	18:2	800.58	519/545	493/519,533/559	11	9,12		0.220165	0.23472	0.267213	0.245164	0.251965		0.243845	0.0158602	0.0650422
PE 36:3	742.538	740.524	255/305	16:0	20:3	800.58		411/437,451/477,491/517		5,8,11		0.711539	0.600658	0.653115	0.666725	0.683778		0.663163	0.0368395	0.0555512
PE 36:3	742.538	740.524	255/305	16:0	20:3	800.58		453/479,493/519,533-559		8,11,14		0.288461	0.399342	0.346885	0.333275	0.316222		0.336837	0.0368395	0.109369
PE 36:2	744.554	742.539	281/281	18:1	18:1	802.596	493/519		9	9		0.790159	0.806733	0.79989	0.799699	0.788402		0.796977	0.00679852	0.00853039
PE 36:2	744.554	742.539	281/281	18:1	18:1	802.596	521/547		11	11		0.209841	0.193267	0.20011	0.200301	0.211598		0.203023	0.00679852	0.0334864
PE 36:2	744.554	742.539	279/283	18:0	18:2	802.596	495/521,535/561			9,12
PE 36:1	746.569	744.555	281/283	18:0	18:1	804.611	495/521			9		0.929822	0.920283	0.919482	0.923403	0.920806		0.922759	0.00376794	0.00408334
PE 36:1	746.569	744.555	281/283	18:0	18:1	804.611	523/549			11		0.070178	0.0797169	0.0805183	0.0765968	0.0791943		0.0772409	0.00376794	0.0487817
PE 36:1	746.569	744.555	255/309	16:0	20:1	804.611	495/521			11
PE 36:1	746.569	744.555	255/309	16:0	20:1	804.611	523/549			13
PE P-38:6	748.528	746.513	364/385	16:0p	22:6	806.569
PE P-38:5	750.543	748.529	364/387	16:0p	22:5	808.585
PE P-38:5	750.543	748.529	390/361	18:1p	20:4	808.585
PE P-38:4	752.559	750.544	364/389	16:0p	22:4	810.601
PE P-38:4	752.559	750.544	392/361	18:0p	20:4	810.601
PE P-38:2	756.59	754.576	390/367	18:1p	20:1	814.632
PE P-38:1	758.606	756.591	392/367	18:0p	20:1	816.648		507/533		11		0.688071	0.663315	0.603951	0.635338	0.627612		0.643657	0.0291967	0.0453606
PE P-38:1	758.606	756.591	392/367	18:0p	20:1	816.648		535/561		13		0.271774	0.336685	0.396049	0.364662	0.372388		0.348311	0.0427063	0.122609
PE 37:2	758.569	756.555	267/309	17:1	20:1	816.611
PE 38:7	762.507	760.492	253/327	16:1	22:6	820.549
PE O-39:6	764.559	762.544				822.601
PE 38:6	764.522	762.508	255/327	16:0	22:6	822.564		/423,437/463,477/503,517/533,557/583,597/623		4,7,10,13,16,19
PE 38:6	764.522	762.508	279/303	18:2	20:4	822.564	515/531,555/581	435/461,475/501,515/531,555/581	9,12	5,8,11,14
PE 38:5	766.538	764.524	281/303	18:1	20:4	824.58	437/463,477/503,517/543,557/583	515/541	9	5,8,11,14		0.755582	0.757833	0.740188	0.73053	0.742899		0.745406	0.0101271	0.0135861
PE 38:5	766.538	764.524	281/303	18:1	20:4	824.58	437/463,477/503,517/543,557/583	543/569	11	5,8,11,14		0.244418	0.242167	0.259812	0.26947	0.257101		0.254594	0.0101271	0.0397776
PE 38:5	766.538	764.524	255/329	16:0	22:5	824.58	439/465,479/505,519/545,559/585,599/625			7,10,13,16,19
PE 38:5	766.538	764.524	255/329	16:0	22:5	824.58	/423,437/463,477/503,517/543,557/583			4,7,10,13,16
PE O-39:4	768.59	766.576				826.632
PE 38:4	768.554	766.539	255/331	16:0	22:4	826.596	439/465,479/505,519/545,559/585			7,10,13,16
PE 38:4	768.554	766.539	283/303	18:0	20:4	826.596	439/465,479/505,519/545,559/585			5,8,11,14
PE O-39:4	770.606	768.591				828.648
PE 38:2	772.585	770.571		18:1	20:1	830.627	521/547	9	11
PE 38:2	772.585	770.571		18:1	20:1	830.627	549/575	11	13
PE P-40:7	774.543	772.529	390/385	18:1p	22:6	832.585
PE P-40:6	776.559	774.544	392/385	18:0p	22:6	834.601
PE P-40:4	780.59	778.576	392/389	18:0p	22:4	838.632
PE P-40:2	784.621	782.607	390/395	18:1p	22:1	842.663
PE 40:8	788.522	786.508				846.564
PE 40:7	790.538	788.524	281/327	18:1	22:6	848.58	539/565	423/449,463/489,503/529,543/569,583/609,623/649	9	4,7,10,13,16,19		0.602628	0.604268	0.575945	0.591642	0.589672		0.592831	0.0102307	0.0172574
PE 40:7	790.538	788.524	281/327	18:1	22:6	848.58	567/593	423/449,463/489,503/529,543/569,583/609,623/649	11	4,7,10,13,16,19		0.397372	0.395732	0.424055	0.408358	0.410328		0.407169	0.0102307	0.0251265
PE 40:6	792.554	790.539	283/327	18:0	22:6	850.596	425/451,465/491,505/531,545/571,585/611,625/651			4,7,10,13,16,19
PE 40:6	794.569	792.555				852.611
PE 40:4	796.585	794.571	283/331	18:0	22:4	854.627	467/493,507/533,547/573,587/613			7,10,13,16
PC 30:1	704.522	762.529				762.564
PC 31:1	718.538	776.545	239/255	15:1	16:0	776.58
PC O-32:1	718.575	776.581	253/255	16:1	16:0	776.616	608/634		7
PC O-32:1	718.575	776.581	253/255	16:1	16:0	776.616	636/662		9
PC O-33:3	728.559	786.565				786.601
PC O-33:2	730.575	788.581				788.616
PC 32:2	730.538	788.545		16:1	16:1	788.58	606/632			6
PC 32:2	730.538	788.545		16:1	16:1	788.58	620/646			7		0.353179	0.336506	0.353851	0.28401	0.424889		0.350487	0.0450972	0.12867
PC 32:2	730.538	788.545		16:1	16:1	788.58	648/674			9		0.646821	0.663494	0.646149	0.71599	0.575111		0.649513	0.0450972	0.0694324
PC O-33:1	732.59	790.597				790.632
PC O-33:1	732.59	790.597				790.632
PC 32:1	732.554	790.56	253/255	16:1	16:0	790.596	678/704			11		0.0213249	0.0249105	0.0381516	0.0343717	0.0209243		0.0253828	0.00541681	0.213404
PC 32:1	732.554	790.56	253/255	16:1	16:0	790.596	650/676			9		0.585571	0.569164	0.575923	0.587507	0.573655		0.578974	0.00775987	0.0134028
PC 32:1	732.554	790.56	253/255	16:1	16:0	790.596	622/648			7		0.201514	0.198204	0.194628	0.196205	0.20164		0.198438	0.00280226	0.0141216
PC 32:1	732.554	790.56	253/255	16:1	16:0	790.596	608/634			6		0.19159	0.207722	0.191297	0.181916	0.203781		0.195261	0.00932882	0.0477761
PC 33:4	740.522	798.529				798.564
PC O-34:3	742.575	800.581				800.616
PC 33:2	744.554	802.56	255/279	16:0	18:2	802.596
PC O-34:2	744.59	802.597	255/279	16:0	18:2	802.632
PC O-34:2	744.59	802.597	253/281	16:1	18:1	802.632	634/660		7	9
PC O-34:2	744.59	802.597	253/281	16:1	18:1	802.632	662/688		9	11
PC O-34:1	746.606	804.612	255/281	16:0	18:1	804.648	636/662			9		0.840184	0.867179	0.836676	0.837539	0.833061		0.842928	0.0123379	0.014637
PC O-34:1	746.606	804.612	255/281	16:0	18:1	804.648	664/690			11		0.159816	0.132821	0.163324	0.162461	0.166939		0.157072	0.0123379	0.0785492
PC 33:1	746.569	804.576	255/267	16:0	17:1	804.611	650/676			9
PC 33:1	746.569	804.576	255/267	16:0	17:1	804.611	678/704			11
PC 34:2	758.569	816.576	255/279	16:0	18:2	816.611		650/676,690/716		9,12
PC 34:2	758.569	816.576	253/281	16:1	18:1	816.611	648/674		7	9
PC 34:2	758.569	816.576	253/281	16:1	18:1	816.611	676/702		9	11
PC 34:1	760.585	818.592	255/281	16:0	18:1	818.627	650/676			9		0.765559	0.760754	0.76574	0.765237	0.763545		0.764167	0.00187559	0.00245443
PC 34:1	760.585	818.592	255/281	16:0	18:1	818.627	678/704			11		0.234441	0.239246	0.23426	0.234763	0.236455		0.235833	0.00187559	0.00795306
PC 34:1	760.585	818.592	255/281	16:0	18:1	818.627	706/732			13
PC 35:4	768.554	826.56				826.596
PC O-36:4	768.554	826.56	255/303	16:0	20:4	826.596	580/606,620/646,660/686,700/726		5,8,11,14
PC 35:3	770.569	828.576				828.611
PC O-36:3	770.606	828.612				828.648
PC O-36:2	772.621	830.628	255/307	16:0	20:2	830.663
PC 35:2	772.585	830.592	267/281	17:1	18:1	830.627	662/688		8	9
PC 35:2	772.585	830.592	267/281	17:1	18:1	830.627	690/716		10	11
PC 35:2	772.585	830.592	267/281	17:1	18:1	830.627	676/702		9	10
PC 35:2	772.621	830.628	269/279	17:0	18:2	830.663		664/690,704/730		9,12
PC O-36:1	774.601	832.607	281/283	18:0	18:1	832.643	664/690		9
PC O-36:1	774.601	832.607	281/283	18:0	18:1	832.643	692/718		11
PC 35:1	774.601	832.607	267/283	17:1	18:0	832.643	650/676		9
PC 35:1	774.601	832.607	267/283	17:1	18:0	832.643	678/704		11
PC 35:1	774.601	832.607	255/295	16:0	19:1	832.643	678/704		9
PC 35:1	774.601	832.607	255/295	16:0	19:1	832.643	706/732		11
PC 35:1	774.601	832.607	269/281	17:0	18:1	832.643	664/690		9			0.801431	0.781557	0.788465	0.792204	0.789279		0.790587	0.00644943	0.00815778
PC 35:1	774.601	832.607	269/281	17:0	18:1	832.643	692/718		11			0.198569	0.218443	0.211535	0.207796	0.210721		0.209413	0.00644943	0.0307977
PC 36:5	780.554	838.56	253/303	16:1	20:4	838.596
PC 36:5	780.554	838.56	283/331	18:0	22:5	838.596
PC 36:4	782.569	840.576	255/303	16:0	20:4	840.611	594/620,634/660,674/700,714/740		5,8,11,14
PC 36:3	784.585	842.592	255/305	16:0	20:3	842.627
PC 36:3	784.585	842.592	279/281	18:2	18:1	842.627
PC 36:2	786.601	844.607	281/281	18:1	18:1	844.643	676/702	676/702	9	9		0.740066	0.742709	0.737257	0.739651	0.735779		0.739092	0.00239554	0.00324118
PC 36:2	786.601	844.607	281/281	18:1	18:1	844.643	704/730	704/730	11	11		0.259934	0.257291	0.262743	0.260349	0.264221		0.260908	0.00239554	0.00918155
PC 36:2	786.601	844.607	279/283	18:0	18:2	844.643	678/704,718/744		9,12
PC 36:2	786.601	844.607	255/307	16:0	20:2	844.643	678/704,718/744		11,14
PC 36:1	788.616	846.623	281/283	18:0	18:1	846.658	678/704		9			0.870046	0.854164	0.861459	0.866294	0.860739		0.862541	0.00538542	0.00624368
PC 36:1	788.616	846.623	281/283	18:0	18:1	846.658	706/732		11			0.130895	0.145836	0.138239	0.133706	0.139261		0.137588	0.00512094	0.0372195
PC 36:1	788.616	846.623	255/309	16:0	20:1	846.658	678/704		11
PC 36:1	788.616	846.623	255/309	16:0	20:1	846.658	706/732		13
PC O-38:6	792.554	850.56	255/327	16:0	22:6	850.596		566/592,606/632,646/672,686/712,726/752,766/792		4,7,10,13,16,19
PC 37:6	792.59	850.597				850.632
PC O-38:5	794.606	852.612				852.648
PC O-38:5	794.606	852.612				852.648
PC O-38:4	796.621	854.628	283/303	18:0	20:4	854.663
PC O-38:4	796.621	854.628	255/331	16:0	22:4	854.663
PC 38:6	806.569	864.576	255/327	16:0	22:6	864.611		580/606,620/646,660/686,700/726,740/766,780/806		4,7,10,13,16,19
PC 38:5	808.585	866.592	281/303	18:1	20:4	866.627	620/646,660/686,700/726,740/766	698/724	9	5,8,11,14		0.713164	0.717828	0.709352	0.710645	0.718293		0.713857	0.00364818	0.00511053
PC 38:5	808.585	866.592	281/303	18:1	20:4	866.627	620/646,660/686,700/726,740/766	726/752	11	5,8,11,14		0.286836	0.282172	0.290648	0.289355	0.281707		0.286143	0.00364818	0.0127495
PC 38:5	808.585	866.592	255/329	16:0	22:5	866.627
PC 38:4	810.601	868.607	283/303	18:0	20:4	868.643	622/648,662/688,702/728,742/767		5,8,11,14
PC 38:4	810.601	868.607	255/331	16:0	22:4	868.643	622/648,662/688,702/728,742/768		7,10,13,16
PC 38:2	814.632	872.639	281/309	18:1	20:1	872.674	704/730	9	11
PC 38:2	814.632	872.639	281/309	18:1	20:1	872.674	732/758	11	13
PC 38:2	814.632	872.639	283/307	18:0	20:2	872.674	706/732,746/772		11,14
PC 38:1	816.59	874.597	283/309	18:0	20:1	874.632
PC 38:1	816.59	874.597	281/311	18:1	20:0	874.632
PC 38:1	816.59	874.597	255/337	16:0	22:1	874.632
PC 40:8	830.569	888.576				888.611
PC 40:7	832.585	890.592				890.627
PC 40:6	834.601	892.607	283/327	18:0	22:6	892.643	650/676,690/716,730/756,770/796		7,10,13,16
PC 40:5	836.616	894.623	283/329	18:0	22:5	894.658
PC 40:5	836.616	894.623	281/331	18:1	22:4	894.658
PC 40:4	838.632	896.639	283/331	18:0	22:4	896.674	650/676,690/716,730/756,770/796		7,10,13,16
SM 34:1;O2	703.575	761.581	449	18:1;O2	16:0	761.617
SM 35:1;O2	717.591	775.597	449	18:1;O2	17:0	775.632
SM 36:2;O2	729.591	787.597	447	18:2;O2	18:0	787.632	689/715		n-4
SM 36:1;O2	731.606	789.613	449	18:1;O2	18:0	789.648	691/717		n-4
SM 38:2;O2	757.622	815.628				815.664
SM 38:1;O2	759.637	817.644				817.679
SM 39:1;O2	773.653	831.66				831.695
SM 40:2;O2	785.653	843.66		18:1;O2	22:1	843.695	703/729		n-7
SM 40:1;O2	787.669	845.675	449	18:1;O2	22:0	845.711
SM 42:3;O2	811.669	869.675				869.711	701/727		n-9
SM 42:1;O2	813.684	871.691	449	18:1;O2	24:1	871.726	703/729		n-9			0.988997	0.982072	0.975329	0.978789	0.968166		0.97867	0.00692446	0.00707537
SM 42:1;O2	813.684	871.691	449	18:1;O2	24:1	871.726	731/757		n-7			0.011003	0.017928	0.024671	0.0212111	0.0318344		0.02127	0.00275317	0.129439
SM 42:0;O2	815.7	873.707				873.742	705/731		n-9

## Sheet: Plasma
Subclass	Subclass	Mass	[M-H]-/[M+OAc]-	FFA Peak	Fatty acid 1	Fatty acid 2	[MH+PB]+	Diagnostic Peak	Diagnostic Peak	Double Bond	Double Bond		Sample 1	Sample 2	Sample 3	Sample 4	Sample 5		Average	Variation	Coefficient of Variation	Highlight if CV > 20%
PE 34:1	PE 33:1	704.523	702.508				762.564															Highlight if CV of technical repeats within 15%~25%
PE 34:1	PE 34:2	716.522	714.508	255/279	16:0	18:2	774.564	467/493,507/533														Highlight if the data is discarded due to 1) CV of technical repeats > 25%; or 2) high deviation compared with other samples
PE 36:3	PE 34:1	718.538	716.524	255/281	16:0	18:1	776.58	467/493			9		0.777666	0.802545	0.79879	0.833019	0.836186		0.809641	0.0220984	0.0272941
PE 36:3	PE 34:1	718.538	716.524	255/281	16:0	18:1	776.58	495/521			11		0.222334	0.197455	0.20121	0.166981	0.163814		0.190359	0.0220984	0.116088
PE 36:2	PE O-36:5	724.528	722.513				782.569
PE 36:2	PE O-36:4	726.543	724.529				784.585
PE 36:1	PE O-36:3	728.559	726.544	279	18:1e	18:2	786.601
PE 36:1	PE O-36:2	730.575	728.56	279	18:0e	18:2	788.616		481/507,521/547		9,12
PE 38:5	PE 35:2	730.538	728.524				788.58
PE 38:5	PE 35:1	732.538	730.524				790.58
PC 32:2	PE 36:5	738.507	736.492				796.549
PC 32:2	PE 36:4	740.522	738.508	255/303	16:0	20:4	798.564		411/437,451/477,491/517,531/557		5,8,11,14
PC 32:1	PE 36:4	740.522	738.508	279/279	18:2	18:2	798.564		491/517,531/557	9,12	9,12
PC 32:1	PE 36:3	742.538	740.524	279/281	18:2	18:1	800.58	493/519,533/559	491/517	9,12	9
PC 32:1	PE 36:3	742.538	740.524	279/281	18:2	18:1	800.58	493/519,533/559	519/545	9,12	11
PC 34:3	PE 36:2	744.554	742.539	279/283	18:2	18:0	802.596	495/521,535/561		9,12
PC 34:3	PE 36:2	744.554	742.539	281/281	18:1	18:1	802.596	493/519		9	9
PC 34:1	PE 36:2	744.554	742.539	281/281	18:1	18:1	802.596	521/547		11	11
PC 34:1	PE 36:1	746.569	744.555	281/283	18:1	18:0	804.611	495/521		9
PC 35:1	PE 36:1	746.569	744.555	281/283	18:1	18:0	804.611	523/549		11
PC 35:1	PE O-38:6	750.507	748.492				808.549
PC 36:3	PE O-38:5	752.559	750.544	303	18:1e	20:4	810.601
PC 36:3	PE O-38:4	754.537	752.523	303	18:0	20:4	812.579	425/451,465/491,505/531,545/571			5,8,11,14
PC 36:2	PE 37:3	756.554	754.539				814.596
PC 36:2	PE 38:7	762.507	760.492				820.549
PC 36:1	PE 38:6	764.522	762.508	255/327	16:0	22:6	822.564	/423,437/463,477/503,517/533,557/583,597/623			4,7,10,13,16,19
PC 36:1	PE 38:5	766.538	764.524	281/303	18:1	20:4	824.58	437/463,477/503,517/543,557/583	515/541	9	5,8,11,14
PC 38:5	PE 38:5	766.538	764.524	281/303	18:1	20:4	824.58	437/463,477/503,517/543,557/583	543/569	11	5,8,11,14
PC 38:5	PE 38:5	766.538	764.524	255/329	16:0	22:5	824.58		439/465,479/505,519/545,559/585,599/625		7,10,13,16,19
PC 40:5	PE 38:4	768.554	766.539	283/303	18:0	20:4	826.596	439/465,479/505,519/545,559/585			7,10,13,16
PC 40:5	PE 39:7	776.522	774.508				834.564
PC 40:7	PE 39:5	780.554	778.539	295/303	19:1	20:4	838.596
PC 40:7	PE 39:4	782.569	780.555				840.611
SM 42:2	PE 40:7	790.538	788.524				848.58
SM 42:2	PE 40:6	792.554	790.539	283/327	18:0	22:6	850.596
	PE O-41:6	794.606	792.591				852.648
	PE 40:5	794.569	792.555				852.611
	PE 40:4	796.585	794.571				854.627
	PC 30:1	704.522	762.529				762.564
	PC O-32:1	718.575	776.581	253/255	16:0	16:1	776.616		636/662		9
	PC 31:1	718.538	776.545				776.58
	PC 32:2	730.538	788.545				788.58	622/648,662/688
	PC 32:2	730.538	788.545	253/253	16:1	16:1	788.58	648/674		9	9		0.883938	0.915669	0.864075	0.859076	0.876066		0.878722	0.0222072	0.0252722
	PC 32:2	730.538	788.545	253/253	16:1	16:1	788.58	620/646		7	7		0.116062	0.0843307	0.135925	0.140924	0.123934		0.121278	0.0222072	0.18311
	PC 32:1	732.554	790.56	253/255	16:1	16:0	790.596	650/676		9			0.831716	0.822072	0.824275	0.822825	0.82717		0.826496	0.00339523	0.00410798
	PC 32:1	732.554	790.56	253/255	16:1	16:0	790.596	622/648		7			0.158021	0.160704	0.165289	0.168006	0.159522		0.162709	0.00408787	0.0251238
	PC 32:1	732.554	790.56	253/255	16:1	16:0	790.596	608/634		6			0.0102632	0.017224	0.0104366	0.00916899	0.0133075		0.0107941	0.00153036	0.141778
	PC O-34:3	742.574	800.581				800.616
	PC 33:2	744.554	802.56	241/279	15:0	18:2	802.596		636/662,676/702		9,12
	PC O-34:2	744.59	802.597	279	16:0e	18:2	802.632		636/662,676/702		9,12
	PC 33:1	746.569	804.576	255/267	16:0	17:1	804.611		650/676		9		0.811146	0.787766	0.848974	0.814182	0.809651		0.805686	0.0104742	0.0130003
	PC 33:1	746.569	804.576	255/267	16:0	17:1	804.611		678/704		11		0.188854	0.212234	0.151026	0.185818	0.190349		0.194314	0.0104742	0.0539034
	PC 33:1	746.569	804.576	241/281	15:0	18:1	804.611		636/662		9
	PC 33:1	746.569	804.576	241/281	15:0	18:1	804.611		664/690		11
	PC O-34:1	746.606	804.612	255/281	16:0	18:1	804.648		636/662		9
	PC O-34:1	746.606	804.612	255/281	16:0	18:1	804.648		664/690		11
	PC 34:3	756.554	814.56	253/279	16:1	18:2	814.596	646/672	648/674,688/714	7	9,12		0.227112	0.23384	0.207952	0.231413	0.26125		0.232313	0.0170937	0.0735804
	PC 34:3	756.554	814.56	253/279	16:1	18:2	814.596	674/700	648/674,688/714	9	9,12		0.772888	0.76616	0.792048	0.768587	0.73875		0.767687	0.0170937	0.0222665
	PC 34:3	756.554	814.56	255/277	16:0	18:3	814.596		608/634,648/674,688/714		6,9,12		0.223656	0.23209	0.207565	0.208841	0.194707		0.213372	0.0131055	0.0614208
	PC 34:3	756.554	814.56	255/277	16:0	18:3	814.596		650/676,690/716,730/756		9,12,15		0.776344	0.76791	0.792435	0.791159	0.805293		0.786628	0.0131055	0.0166603
	PC 34:2	758.569	816.576	255/279	16:0	18:2	816.611		650/676,690/716		9,12
	PC 34:2	758.569	816.576	253/281	16:1	18:1	816.611	648/674	648/674	7	9
	PC 34:2	758.569	816.576	253/281	16:1	18:1	816.611	676/702	676/702	9	11
	PC 34:1	760.585	818.592	255/281	16:0	18:1	818.627	650/676			9		0.842589	0.842589	0.873918	0.871293	0.880582		0.862194	0.0162915	0.0188954
	PC 34:1	760.585	818.592	255/281	16:0	18:1	818.627	678/704			11		0.157411	0.157411	0.126082	0.128707	0.119418		0.137806	0.0162915	0.118221
	PC O-36:5	766.574	824.581				824.616
	PC O-36:4	768.59	826.597	255/303	16:0	20:4	826.632	580/606,620/646,660/686,700/726		5,8,11,14
	PC O-36:4	768.59	826.597	279	18:2e	18:2	826.632	660/686,700/726		9,12	9,12
	PC 35:4	768.554	826.56				826.596
	PC 35:3	770.569	828.576	267/279	17:1	18:2	828.611	674/700	662/688,702/728	9	9,12
	PC 35:3	770.569	828.576	267/279	17:1	18:2	828.611	702/728	662/688,702/728	11	9,12
	PC 35:2	772.585	830.592	279/269	18:2	17:0	830.627	664/690,704/730		9,12
	PC 35:2	772.585	830.592	267/281	18:1	17:1	830.627	662/688		9	10
	PC 35:2	772.585	830.592	267/281	18:1	17:1	830.627	676/702		10	11
	PC 35:2	772.585	830.592	267/281	18:1	17:1	830.627	690/716		11	12
	PC 35:1	774.601	832.607	281/269	18:1	17:0	832.643	664/690		9			0.829824	0.821868	0.78544	0.821963	0.823458		0.816511	0.0158072	0.0193594
	PC 35:1	774.601	832.607	281/269	18:1	17:0	832.643	692/718		11			0.170176	0.178132	0.21456	0.178037	0.176542		0.183489	0.0158072	0.0861475
	PC 35:1	774.601	832.607	255/295	16:0	19:1	832.643		678/704		9
	PC 36:6	778.535	836.542				836.577
	PC 36:5	780.554	838.56	255/301	16:0	20:5	838.596	594/620,634/660,674/700,714/740,754/780			5,8,11,14,17
	PC 36:5	780.554	838.56	253/303	16:1	20:4	838.596	698/724	592/618,632/658,672/698,712/738	9	5,8,11,14
	PC 36:5	780.554	838.56	277/279	18:3	18:2	838.596	674/700,714/740,754/780	672/698,712/738	9,12,15	9,12
	PC 36:4	782.569	840.576	255/303	16:0	20:4	840.611	594/620,634/660,674/700,714/740			5,8,11,14
	PC 36:4	782.569	840.576	279/279	18:2	18:2	840.611	674/700,714/740		9,12	9,12
	PC 36:3	784.585	842.592	255/305	16:0	20:3	842.627	636/662,676/702,716/742			8,11,14		0.920318	0.906212	0.921788	0.925935	0.912132		0.917277	0.00711977	0.00776185
	PC 36:3	784.585	842.592	255/305	16:0	20:3	842.627	594/620,634/660,674/700			5,8,11		0.0796821	0.0937878	0.0782124	0.0740649	0.087868		0.082723	0.00711977	0.0860675
	PC 36:3	784.585	842.592	279/281	18:2	18:1	842.627	676/702,716/742	674/700	9,12	9		0.651285	0.613313	0.647708	0.653595	0.660833		0.645347	0.0165822	0.025695
	PC 36:3	784.585	842.592	279/281	18:2	18:1	842.627	676/702,716/742	702/728	9,12	11		0.348715	0.386687	0.352292	0.346405	0.339167		0.354653	0.0165822	0.046756
	PC 36:2	786.601	844.607	279/283	18:2	18:0	844.643	678/704,718/744		9,12
	PC 36:2	786.601	844.607	281/281	18:1	18:1	844.643	676/702		9	9		0.733229	0.718516	0.73418	0.742827	0.727873		0.731325	0.0080008	0.0109401
	PC 36:2	786.601	844.607	281/281	18:1	18:1	844.643	704/730		11	11		0.266771	0.281484	0.26582	0.257173	0.272127		0.268675	0.0080008	0.0297787
	PC 36:1	788.616	846.623	281/283	18:1	18:0	846.658	678/704		9			0.865263	0.84624	0.853704	0.85096	0.851674		0.853568	0.00633837	0.00742574
	PC 36:1	788.616	846.623	281/283	18:1	18:0	846.658	706/732		11			0.134737	0.15376	0.146296	0.14904	0.148326		0.146432	0.00633837	0.0432855
	PC O-38:6	792.59	850.597	255/327	16:0	22:6	850.632
	PC O-38:6	792.59	850.597	279/303	18:2	20:4	850.632
	PC 37:6	792.554	850.56	241/327	15:0	22:6	850.596
	PC O-38:5	794.602	852.609		18:1	20:4	852.644	684/710	606/632,646/672,686/712,726/752	9	5,8,11,14
	PC 37:5	794.569	852.576				852.611
	PC O-38:4	796.621	854.628	283/303	18:0	20:4	854.663
	PC 37:4	796.585	854.592	269/303	17:0	20:4	854.627	608/634,648/674,688/714,728/754			5,8,11,14
	PC 37:3	798.601	856.607		17:0	20:3	856.643	650/676,690/716,730/756			8,11,14		0.748212	0.74224	0.731074	0.737515	0.748988		0.741606	0.00672596	0.00906945
	PC 37:3	798.601	856.607		17:0	20:3	856.643	608/634,648/674,688/714			5,8,11		0.251788	0.25776	0.268926	0.262485	0.251012		0.258394	0.00672596	0.0260298
	PC 37:3	798.601	856.607		18:0	19:3	856.643	636/662,676/702,716/742			6,9,12
	PC 37:2	800.616	858.623				858.658		692/718,732/758
	PC 38:7	804.554	862.56		16:1	22:6	862.596	722/748	578/604,618/644,658/684,698/724,738/764,778/804	9	4,7,10,13,16,19
	PC 38:6	806.569	864.576	255/327	16:0	22:6	864.611		580/606,620/646,660/686,700/726,740/766,780/806		4,7,10,13,16,19
	PC 38:6	806.569	864.576	279/303	18:2	20:4	864.611	698/714,738/764	618/644,658/684,698/724,738/764	9,12	5,8,11,14
	PC 38:5	808.585	866.592	281/303	18:1	20:4	866.627	620/646,660/686,700/726,740/766	698/724	9	5,8,11,14		0.711505	0.659175	0.67374	0.685541	0.685467		0.683086	0.0171953	0.025173
	PC 38:5	808.585	866.592	281/303	18:1	20:4	866.627	620/646,660/686,700/726,740/766	726/752	11	5,8,11,14		0.288495	0.340825	0.32626	0.314459	0.314533		0.316914	0.0171953	0.0542585
	PC 38:5	808.585	866.592	255/329	16:0	22:5	866.627	622/648,662/688,702/728,742/768,782/808			5,8,11,14,17
	PC 38:5	808.585	866.592	279/305	18:2	20:3	866.627	700/726,740/766	658/684,698/724,738/764	9,12	8,11,14
	PC 38:4	810.601	868.607	283/303	18:0	20:4	868.643	622/648,662/688,702/728,742/767		5,8,11,14
	PC 38:3	812.616	870.623		18:0	20:3	870.658	664/690,704/730,744/770			8,11,14
	PC 38:2	814.626	872.633	279/311	18:2	20:0	872.668	706/732,746/772		9,12
	PC 38:2	814.626	872.633	283/307	18:0	20:2	872.668	706/732,746/772		11,14
	PC 38:2	814.626	872.633	281/309	18:1	20:1	872.668
	PC O-40:7	818.599	876.606				876.641
	PC 39:6	820.581	878.588				878.623
	PC 39:5	822.594	880.601				880.636
	PC 39:4	824.616	882.623				882.658
	PC 40:8	830.569	888.576		18:2	22:6	888.611	722/748,762/788	604/630,644/670,684/710,724/750,764/790,804/830		4,7,10,13,16,19
	PC 40:7	832.585	890.592	281/327	18:1	22:6	890.627	722/748	606/632,646/672,686/712,726/752,766/792,806/832	9	4,7,10,13,16,19		0.760973	0.632796	0.763011	0.76165	0.700079		0.723702	0.0513739	0.0709876
	PC 40:7	832.585	890.592	281/327	18:1	22:6	890.627	750/776	606/632,646/672,686/712,726/752,766/792,806/832	11	4,7,10,13,16,19		0.239027	0.367204	0.236989	0.20454	0.299921		0.269536	0.0577528	0.214267
	PC 40:6	834.601	892.607	283/327	18:0	22:6	892.643		608/634,648/674,688/714,728/754,768/794,808/834		4,7,10,13,16,19
	PC 40:5	836.616	894.623	283/329	18:0	22:5	894.658		650/676,690/716,730/756,770/796,810/836		7,10,13,16,19
	PC 40:5	836.616	894.623	303/309	20:4	20:1	894.658	648/674,688/714,728/754,768/794	726/752	5,8,11,14	11		0.801316	0.723036	0.77071	0.774637	0.724365		0.748187	0.0245306	0.0327868
	PC 40:5	836.616	894.623	303/309	20:4	20:1	894.658	648/674,688/714,728/754,768/794	754/780	5,8,11,14	13		0.162609	0.276964	0.22929	0.225363	0.275635		0.251813	0.0245306	0.0974161
	PC 40:4	838.632	896.639	283/303	18:0	20:4	896.674		650/676,690/716,730/756,770/796		5,8,11,14
	SM 33:1;O2	689.559	747.566				747.601
	SM 34:2;O2	701.559	759.566		18:1;O2	16:1	759.601		661/687		n-7
	SM 34:1;O2	703.575	761.581	449	18:1;O2	16:0	761.617
	SM 36:2;O2	729.591	787.597				787.632
	SM 36:1;O2	731.606	789.613				789.648
	SM 37:1;O2	745.622	803.628				803.664
	SM 38:2;O2	757.622	815.628				815.664
	SM 38:1;O2	759.637	817.644				817.679
	SM 40:2;O2	785.653	843.66		18:1;O2	22:1	843.695		703/729		n-7
	SM 40:2;O2	785.653	843.66		18:2;O2	22:0	843.695		745/771		n-4
	SM 40:1;O2	787.669	845.675				845.711
	SM 42:3;O2	811.669	869.675				869.711	701/727	771/797	n-9	n-4
	SM 42:2;O2	813.684	871.691	449	18:1;O2	24:1	871.726		703/729		n-9
	SM 42:2;O2	813.684	871.691	449	18:1;O2	24:1	871.726		731/757		n-7
	SM 42:2;O2	813.684	871.691		18:2;O2	24:0	871.726	773/799		n-4
	SM 42:1;O2	815.7	873.707				873.742
